# Supplementary material for: MicroRNA duplication accelerates the recruitment of new targets during vertebrate evolution
Source: PubMed Central journal article supplement — RNA. 2018 Jun;24(6):787–802. doi: 10.1261/rna.062752.117 (PMC5959248; doi:10.1261/rna.062752.117), 2018-06
Supplement: supp_062752.117_Supplemental_Material_.pdf [file supp_062752.117_Supplemental_Material_.pdf]

## Supplementary Tables

**Table S1. The conserved miRNA precursors that are duplicated or single-copy in humans (excel file).**

**Table S2. The 574 mature miRNAs and their average expression level (RPM) across the 181 datasets**

| miRNA           | RPM      | miRNA             | RPM    | miRNA            | RPM   |
|-----------------|----------|-------------------|--------|------------------|-------|
| hsa-miR-21-5p   | 82106.27 | hsa-miR-421       | 190.72 | hsa-miR-766-3p   | 22.83 |
| hsa-let-7f-5p   | 66056.48 | hsa-miR-452-5p    | 185.38 | hsa-miR-105-5p   | 22.35 |
| hsa-let-7a-5p   | 57991.92 | hsa-miR-429       | 177.51 | hsa-miR-1225-5p  | 21.80 |
| hsa-miR-143-3p  | 52248.75 | hsa-miR-331-3p    | 172.79 | hsa-miR-1304-3p  | 21.69 |
| hsa-miR-486-5p  | 38969.27 | hsa-miR-455-3p    | 172.68 | hsa-miR-548av-3p | 21.66 |
| hsa-miR-26a-5p  | 37256.47 | hsa-miR-17-3p     | 167.00 | hsa-miR-513c-5p  | 21.62 |
| hsa-miR-92a-3p  | 33787.35 | hsa-miR-96-5p     | 160.07 | hsa-miR-378a-5p  | 21.29 |
| hsa-miR-181a-5p | 32284.11 | hsa-miR-378d      | 159.81 | hsa-miR-1301-3p  | 21.28 |
| hsa-miR-22-3p   | 30377.68 | hsa-miR-508-3p    | 159.10 | hsa-miR-409-5p   | 21.23 |
| hsa-miR-451a    | 29245.08 | hsa-miR-20b-5p    | 156.90 | hsa-miR-655-3p   | 21.00 |
| hsa-let-7b-5p   | 21680.38 | hsa-miR-656-3p    | 156.55 | hsa-miR-509-3p   | 20.73 |
| hsa-miR-378c    | 16756.89 | hsa-miR-193a-3p   | 156.02 | hsa-miR-873-3p   | 20.72 |
| hsa-miR-9-5p    | 16459.67 | hsa-miR-33a-5p    | 155.92 | hsa-miR-592      | 20.70 |
| hsa-miR-16-5p   | 15424.42 | hsa-miR-7704      | 150.60 | hsa-miR-3609     | 20.68 |
| hsa-miR-30a-5p  | 15246.96 | hsa-miR-339-5p    | 149.20 | hsa-miR-195-3p   | 20.39 |
| hsa-let-7g-5p   | 14301.91 | hsa-miR-302b-3p   | 148.61 | hsa-miR-3176     | 20.04 |
| hsa-miR-378a-3p | 14108.16 | hsa-miR-137       | 144.83 | hsa-miR-200b-5p  | 20.02 |
| hsa-miR-101-3p  | 13627.95 | hsa-miR-502-3p    | 141.83 | hsa-miR-1269b    | 19.86 |
| hsa-miR-103a-3p | 13581.60 | hsa-miR-671-3p    | 140.64 | hsa-miR-664a-5p  | 19.63 |
| hsa-miR-191-5p  | 12167.02 | hsa-miR-487b-3p   | 139.57 | hsa-miR-377-5p   | 19.60 |
| hsa-miR-148a-3p | 12015.82 | hsa-miR-767-5p    | 138.74 | hsa-miR-346      | 19.55 |
| hsa-miR-375     | 10757.46 | hsa-miR-369-3p    | 136.28 | hsa-miR-3065-5p  | 19.42 |
| hsa-miR-24-3p   | 9894.80  | hsa-miR-301b-3p   | 134.41 | hsa-miR-145-3p   | 19.26 |
| hsa-miR-10a-5p  | 9273.11  | hsa-miR-190a-5p   | 132.74 | hsa-miR-576-5p   | 19.08 |
| hsa-let-7c-5p   | 9259.19  | hsa-miR-885-5p    | 130.23 | hsa-miR-26b-3p   | 18.87 |
| hsa-miR-155-5p  | 8731.76  | hsa-miR-708-5p    | 129.98 | hsa-miR-33a-3p   | 18.77 |
| hsa-let-7i-5p   | 8590.47  | hsa-miR-148a-5p   | 129.65 | hsa-miR-487a-3p  | 18.33 |
| hsa-miR-30d-5p  | 8224.59  | hsa-miR-134-5p    | 129.09 | hsa-miR-299-3p   | 18.21 |
| hsa-miR-146b-5p | 8105.41  | hsa-miR-330-3p    | 128.34 | hsa-miR-1468-5p  | 18.07 |
| hsa-miR-30e-5p  | 8048.91  | hsa-miR-33b-5p    | 121.46 | hsa-miR-101-5p   | 17.74 |
| hsa-miR-192-5p  | 7602.45  | hsa-miR-326       | 119.36 | hsa-miR-92b-5p   | 17.63 |
| hsa-miR-125b-5p | 7312.12  | hsa-miR-125b.1-3p | 119.27 | hsa-miR-154-5p   | 17.24 |
| hsa-miR-27b-3p  | 6945.81  | hsa-miR-542-3p    | 117.39 | hsa-miR-138.1-3p | 17.19 |
| hsa-miR-10b-5p  | 6916.87  | hsa-miR-361-3p    | 116.15 | hsa-miR-302a-3p  | 17.08 |
| hsa-miR-19b-3p  | 6905.83  | hsa-miR-376a-5p   | 114.40 | hsa-miR-187-3p   | 16.97 |
| hsa-miR-124-3p  | 6518.43  | hsa-miR-214-3p    | 112.85 | hsa-miR-758-3p   | 16.84 |
| hsa-miR-128-3p  | 6447.18  | hsa-miR-5683      | 109.59 | hsa-miR-940      | 16.81 |
| hsa-miR-126-5p  | 6318.05  | hsa-miR-27b-5p    | 107.00 | hsa-miR-34a-3p   | 16.58 |
| hsa-miR-320a    | 6117.64  | hsa-miR-148b-5p   | 105.70 | hsa-miR-374b-3p  | 16.38 |
| hsa-miR-1-3p    | 5485.72  | hsa-miR-495-3p    | 103.44 | hsa-miR-24.1-5p  | 16.20 |
| hsa-miR-29a-3p  | 5391.40  | hsa-miR-345-5p    | 103.29 | hsa-miR-1247-5p  | 16.19 |
| hsa-miR-127-3p  | 5190.86  | hsa-miR-374c-5p   | 102.96 | hsa-miR-329-3p   | 16.06 |
| hsa-miR-122-5p  | 5165.02  | hsa-miR-129.2-3p  | 102.18 | hsa-miR-942-5p   | 15.95 |
| hsa-miR-182-5p  | 5096.56  | hsa-miR-511-3p    | 100.03 | hsa-miR-891a-5p  | 15.87 |
| hsa-miR-140-3p  | 4949.02  | hsa-miR-7974      | 99.51  | hsa-miR-1269a    | 15.72 |
| hsa-miR-100-5p  | 4845.23  | hsa-miR-577       | 99.21  | hsa-miR-376a-3p  | 15.42 |
| hsa-miR-99b-5p  | 4756.92  | hsa-miR-133a-3p   | 97.77  | hsa-miR-23b-5p   | 15.13 |
| hsa-miR-26b-5p  | 4732.29  | hsa-miR-18b-5p    | 93.08  | hsa-miR-627-5p   | 15.13 |
| hsa-miR-29b-3p  | 4373.79  | hsa-miR-324-5p    | 92.79  | hsa-miR-302d-3p  | 15.04 |
| hsa-let-7e-5p   | 4336.70  | hsa-miR-582-3p    | 92.61  | hsa-miR-431-3p   | 14.97 |
| hsa-miR-25-3p   | 4332.90  | hsa-let-7i-3p     | 91.42  | hsa-miR-675-3p   | 14.69 |
| hsa-miR-186-5p  | 4170.00  | hsa-miR-382-5p    | 91.08  | hsa-let-7f.1-3p  | 14.68 |
| hsa-miR-92b-3p  | 4092.26  | hsa-miR-455-5p    | 90.52  | hsa-miR-128.1-5p | 14.64 |
| hsa-miR-151a-3p | 4037.93  | hsa-let-7a-3p     | 88.48  | hsa-miR-19b.1-5p | 14.54 |

|                 |         |                   |       |                   |       |
|-----------------|---------|-------------------|-------|-------------------|-------|
| hsa-miR-144-5p  | 3905.17 | hsa-miR-378f      | 87.55 | hsa-miR-548ay-5p  | 14.49 |
| hsa-miR-23a-3p  | 3833.48 | hsa-miR-550a-3p   | 87.00 | hsa-miR-2110      | 14.47 |
| hsa-miR-150-5p  | 3566.48 | hsa-miR-509-5p    | 83.24 | hsa-miR-296-5p    | 14.19 |
| hsa-miR-423-5p  | 3544.75 | hsa-miR-106a-5p   | 82.71 | hsa-miR-125a-3p   | 14.13 |
| hsa-miR-9-3p    | 3399.33 | hsa-miR-125b.2-3p | 81.24 | hsa-miR-181b-3p   | 13.94 |
| hsa-miR-27a-3p  | 3311.14 | hsa-miR-485-5p    | 81.19 | hsa-miR-1271-5p   | 13.54 |
| hsa-miR-181b-5p | 3237.83 | hsa-miR-130b-5p   | 80.35 | hsa-miR-196b-3p   | 13.46 |
| hsa-miR-126-3p  | 3091.17 | hsa-miR-136-5p    | 77.26 | hsa-miR-376b-3p   | 13.41 |
| hsa-miR-151a-5p | 3077.65 | hsa-miR-27a-5p    | 76.71 | hsa-miR-98-3p     | 13.38 |
| hsa-let-7d-5p   | 3028.21 | hsa-miR-106b-3p   | 75.89 | hsa-miR-548d-5p   | 13.28 |
| hsa-miR-222-3p  | 2835.61 | hsa-miR-320b      | 74.59 | hsa-miR-222-5p    | 13.26 |
| hsa-miR-142-5p  | 2798.26 | hsa-miR-590-5p    | 74.26 | hsa-miR-15a-3p    | 13.24 |
| hsa-miR-93-5p   | 2786.34 | hsa-miR-31-3p     | 74.05 | hsa-miR-584-5p    | 13.00 |
| hsa-miR-423-3p  | 2765.64 | hsa-miR-432-5p    | 74.00 | hsa-miR-548e-3p   | 12.89 |
| hsa-miR-142-3p  | 2654.04 | hsa-miR-324-3p    | 69.15 | hsa-miR-202-3p    | 12.83 |
| hsa-miR-30c-5p  | 2644.06 | hsa-miR-25-5p     | 68.94 | hsa-miR-2467-5p   | 12.82 |
| hsa-miR-99a-5p  | 2400.29 | hsa-miR-654-3p    | 68.72 | hsa-let-7e-3p     | 12.81 |
| hsa-miR-146a-5p | 2301.50 | hsa-miR-543       | 66.57 | hsa-miR-200a-5p   | 12.68 |
| hsa-miR-20a-5p  | 2296.82 | hsa-miR-22-5p     | 66.29 | hsa-miR-208b-3p   | 12.68 |
| hsa-miR-29c-3p  | 2149.65 | hsa-miR-320c      | 64.79 | hsa-miR-210-5p    | 12.66 |
| hsa-miR-17-5p   | 2113.61 | hsa-miR-29c-5p    | 64.05 | hsa-miR-1298-3p   | 12.65 |
| hsa-miR-23b-3p  | 2042.44 | hsa-miR-494-3p    | 63.34 | hsa-miR-154-3p    | 12.47 |
| hsa-miR-30b-5p  | 2004.13 | hsa-miR-1248      | 61.65 | hsa-miR-550a.3-5p | 12.34 |
| hsa-miR-7-5p    | 1972.57 | hsa-miR-671-5p    | 61.58 | hsa-miR-628-3p    | 12.30 |
| hsa-miR-106b-5p | 1935.49 | hsa-miR-330-5p    | 60.72 | hsa-miR-548o-3p   | 12.29 |
| hsa-miR-98-5p   | 1897.49 | hsa-miR-193a-5p   | 60.07 | hsa-miR-539-5p    | 12.14 |
| hsa-miR-28-3p   | 1881.81 | hsa-miR-212-3p    | 59.30 | hsa-miR-103a.2-5p | 12.00 |
| hsa-miR-200c-3p | 1753.30 | hsa-miR-877-5p    | 58.77 | hsa-miR-34c-3p    | 11.15 |
| hsa-miR-19a-3p  | 1735.56 | hsa-miR-371a-5p   | 58.37 | hsa-miR-4677-3p   | 11.15 |
| hsa-miR-145-5p  | 1679.74 | hsa-miR-3615      | 57.84 | hsa-miR-18a-3p    | 10.99 |
| hsa-miR-21-3p   | 1594.85 | hsa-miR-3607-5p   | 57.76 | hsa-miR-4732-3p   | 10.75 |
| hsa-miR-181c-5p | 1524.96 | hsa-miR-590-3p    | 57.60 | hsa-miR-331-5p    | 10.66 |
| hsa-miR-130a-3p | 1519.24 | hsa-miR-320d      | 55.95 | hsa-miR-10a-3p    | 10.64 |
| hsa-miR-31-5p   | 1474.11 | hsa-miR-1323      | 55.77 | hsa-miR-29b.1-5p  | 10.62 |
| hsa-miR-34c-5p  | 1465.48 | hsa-miR-3613-5p   | 55.51 | hsa-miR-299-5p    | 10.61 |
| hsa-miR-148b-3p | 1341.62 | hsa-miR-493-5p    | 55.27 | hsa-miR-515-5p    | 10.57 |
| hsa-miR-144-3p  | 1337.97 | hsa-miR-95-3p     | 54.69 | hsa-miR-4454      | 10.48 |
| hsa-miR-15a-5p  | 1209.07 | hsa-miR-488-3p    | 54.17 | hsa-miR-1197      | 10.47 |
| hsa-miR-340-5p  | 1199.71 | hsa-miR-887-3p    | 53.96 | hsa-miR-483-5p    | 10.24 |
| hsa-miR-204-5p  | 1182.04 | hsa-miR-99a-3p    | 53.38 | hsa-miR-514b-5p   | 10.12 |
| hsa-miR-1246    | 1137.60 | hsa-miR-216b-5p   | 53.25 | hsa-miR-1973      | 10.09 |
| hsa-miR-129-5p  | 1102.44 | hsa-miR-664a-3p   | 52.89 | hsa-let-7f.2-3p   | 10.03 |
| hsa-miR-221-3p  | 1075.13 | hsa-miR-516b-5p   | 52.82 | hsa-miR-1299      | 10.02 |
| hsa-miR-125a-5p | 1034.59 | hsa-miR-30c.2-3p  | 52.43 | hsa-miR-16.1-3p   | 9.89  |
| hsa-miR-15b-5p  | 1022.10 | hsa-miR-372-3p    | 51.73 | hsa-miR-502-5p    | 9.69  |
| hsa-miR-185-5p  | 961.24  | hsa-miR-383-5p    | 51.07 | hsa-miR-542-5p    | 9.58  |
| hsa-miR-199a-5p | 957.25  | hsa-miR-449a      | 50.87 | hsa-miR-26a.2-3p  | 9.45  |
| hsa-miR-342-3p  | 945.15  | hsa-miR-99b-3p    | 50.53 | hsa-miR-4326      | 9.44  |
| hsa-miR-374a-3p | 924.12  | hsa-miR-29a-5p    | 50.14 | hsa-miR-449c-5p   | 9.33  |
| hsa-miR-381-3p  | 920.05  | hsa-miR-92a.1-5p  | 50.09 | hsa-miR-744-3p    | 9.20  |
| hsa-miR-425-5p  | 867.08  | hsa-miR-1225-3p   | 48.22 | hsa-miR-491-5p    | 9.06  |
| hsa-miR-183-5p  | 858.09  | hsa-miR-532-3p    | 47.94 | hsa-miR-3909      | 9.05  |
| hsa-miR-769-5p  | 855.04  | hsa-miR-127-5p    | 47.93 | hsa-miR-516a-5p   | 8.96  |
| hsa-miR-30e-3p  | 826.18  | hsa-miR-30c.1-3p  | 47.28 | hsa-miR-4461      | 8.87  |
| hsa-miR-200b-3p | 823.44  | hsa-miR-339-3p    | 46.41 | hsa-miR-146b-3p   | 8.87  |
| hsa-miR-210-3p  | 800.38  | hsa-miR-1180-3p   | 45.71 | hsa-miR-1306-5p   | 8.66  |
| hsa-miR-199b-5p | 794.91  | hsa-miR-378b      | 45.60 | hsa-miR-885-3p    | 8.59  |
| hsa-miR-361-5p  | 791.94  | hsa-miR-370-3p    | 45.19 | hsa-miR-641       | 8.59  |
| hsa-miR-141-3p  | 779.51  | hsa-miR-499a-5p   | 45.11 | hsa-miR-3912-3p   | 8.54  |
| hsa-miR-130b-3p | 754.56  | hsa-miR-342-5p    | 44.35 | hsa-miR-152-5p    | 8.49  |
| hsa-miR-195-5p  | 753.79  | hsa-miR-424-3p    | 44.09 | hsa-miR-190b      | 8.44  |
| hsa-miR-107     | 750.05  | hsa-miR-378g      | 43.45 | hsa-miR-1277-3p   | 8.42  |
| hsa-miR-152-3p  | 735.41  | hsa-miR-1298-5p   | 42.93 | hsa-miR-3194-5p   | 8.37  |
| hsa-miR-1307-5p | 702.07  | hsa-miR-15b-3p    | 42.87 | hsa-miR-548ah-3p  | 8.34  |
| hsa-miR-484     | 696.63  | hsa-miR-708-3p    | 42.29 | hsa-miR-874-5p    | 8.30  |
| hsa-miR-181a-3p | 693.08  | hsa-miR-16.2-3p   | 42.16 | hsa-miR-381-5p    | 8.28  |
| hsa-miR-223-3p  | 687.83  | hsa-miR-485-3p    | 42.03 | hsa-miR-6075      | 8.24  |
| hsa-miR-138-5p  | 677.80  | hsa-miR-486-3p    | 42.03 | hsa-miR-185-3p    | 8.20  |
| hsa-miR-132-3p  | 665.62  | hsa-miR-625-5p    | 41.88 | hsa-miR-548ba     | 7.95  |

|                   |        |                  |       |                   |      |
|-------------------|--------|------------------|-------|-------------------|------|
| hsa-miR-323a-3p   | 614.80 | hsa-miR-561-5p   | 40.93 | hsa-miR-769-3p    | 7.55 |
| hsa-miR-30a-3p    | 614.51 | hsa-miR-4485-3p  | 40.88 | hsa-miR-338-5p    | 7.55 |
| hsa-miR-379-5p    | 607.88 | hsa-miR-132-5p   | 40.32 | hsa-miR-30b-3p    | 7.53 |
| hsa-miR-34a-5p    | 595.21 | hsa-miR-450b-5p  | 40.18 | hsa-miR-1270      | 7.49 |
| hsa-miR-181a.2-3p | 572.97 | hsa-miR-377-3p   | 40.18 | hsa-miR-302c-3p   | 7.37 |
| hsa-miR-205-5p    | 558.00 | hsa-miR-551b-3p  | 39.94 | hsa-miR-642a-5p   | 7.21 |
| hsa-miR-301a-3p   | 549.78 | hsa-miR-24.2-5p  | 39.81 | hsa-miR-654-5p    | 7.19 |
| hsa-miR-410-3p    | 506.24 | hsa-miR-548k     | 39.52 | hsa-miR-1303      | 7.17 |
| hsa-miR-218-5p    | 504.07 | hsa-miR-7.1-3p   | 39.44 | hsa-miR-642b-3p   | 7.15 |
| hsa-miR-215-5p    | 492.99 | hsa-miR-582-5p   | 39.36 | hsa-miR-3158-3p   | 7.14 |
| hsa-miR-18a-5p    | 489.20 | hsa-miR-30d-3p   | 38.97 | hsa-miR-545-3p    | 7.11 |
| hsa-miR-532-5p    | 486.05 | hsa-miR-340-3p   | 38.78 | hsa-miR-1251-5p   | 7.11 |
| hsa-miR-411-5p    | 483.52 | hsa-miR-362-5p   | 37.71 | hsa-miR-3928-3p   | 7.08 |
| hsa-miR-193b-3p   | 477.54 | hsa-miR-450a-5p  | 37.62 | hsa-miR-23c       | 7.05 |
| hsa-miR-501-3p    | 474.06 | hsa-miR-628-5p   | 37.46 | hsa-miR-1911-5p   | 6.91 |
| hsa-miR-217       | 462.54 | hsa-miR-3200-3p  | 37.18 | hsa-miR-6500-3p   | 6.83 |
| hsa-miR-219a.2-3p | 448.18 | hsa-miR-93-3p    | 37.04 | hsa-miR-203a-5p   | 6.83 |
| hsa-miR-200a-3p   | 439.41 | hsa-miR-629-5p   | 36.48 | hsa-miR-3065-3p   | 6.79 |
| hsa-miR-136-3p    | 421.51 | hsa-miR-3653-5p  | 35.83 | hsa-miR-337-5p    | 6.78 |
| hsa-miR-203a-3p   | 413.99 | hsa-miR-539-3p   | 35.17 | hsa-miR-7114-5p   | 6.67 |
| hsa-miR-194-5p    | 399.52 | hsa-miR-625-3p   | 34.59 | hsa-miR-124-5p    | 6.67 |
| hsa-miR-424-5p    | 391.16 | hsa-miR-20a-3p   | 34.28 | hsa-miR-518c-3p   | 6.64 |
| hsa-miR-135a-5p   | 390.42 | hsa-miR-514a-3p  | 34.27 | hsa-miR-576-3p    | 6.63 |
| hsa-miR-196b-5p   | 390.18 | hsa-miR-7706     | 34.20 | hsa-miR-483-3p    | 6.60 |
| hsa-miR-335-3p    | 381.96 | hsa-miR-4521     | 33.71 | hsa-miR-2355-5p   | 6.57 |
| hsa-miR-433-3p    | 374.65 | hsa-miR-378e     | 33.61 | hsa-miR-337-3p    | 6.53 |
| hsa-miR-139-5p    | 373.65 | hsa-miR-204-3p   | 33.24 | hsa-miR-1276      | 6.48 |
| hsa-miR-224-5p    | 368.49 | hsa-miR-1249-3p  | 32.55 | hsa-miR-4746-5p   | 6.44 |
| hsa-miR-874-3p    | 362.45 | hsa-miR-873-5p   | 31.83 | hsa-miR-365a-5p   | 6.39 |
| hsa-miR-497-5p    | 353.79 | hsa-miR-188-5p   | 31.63 | hsa-miR-1287-5p   | 6.39 |
| hsa-miR-181d-5p   | 349.93 | hsa-miR-382-3p   | 31.07 | hsa-miR-550a-5p   | 6.38 |
| hsa-miR-760       | 349.80 | hsa-miR-944      | 30.75 | hsa-miR-301a-5p   | 6.35 |
| hsa-miR-1260b     | 341.89 | hsa-miR-212-5p   | 30.44 | hsa-miR-380-3p    | 6.31 |
| hsa-miR-335-5p    | 339.26 | hsa-miR-141-5p   | 30.29 | hsa-miR-4662a-5p  | 6.27 |
| hsa-miR-328-3p    | 331.57 | hsa-miR-1268b    | 30.20 | hsa-let-7c-3p     | 6.20 |
| hsa-miR-140-5p    | 331.10 | hsa-miR-193b-5p  | 30.16 | hsa-miR-449b-5p   | 6.16 |
| hsa-miR-500a-3p   | 330.92 | hsa-miR-139-3p   | 29.74 | hsa-miR-371a-3p   | 6.16 |
| hsa-miR-660-5p    | 330.04 | hsa-miR-505-3p   | 29.73 | hsa-miR-411-3p    | 6.14 |
| hsa-miR-32-5p     | 321.42 | hsa-miR-589-5p   | 29.17 | hsa-miR-3934-5p   | 6.12 |
| hsa-miR-135b-5p   | 311.08 | hsa-miR-133b     | 29.14 | hsa-miR-33b-3p    | 6.11 |
| hsa-miR-216a-5p   | 304.18 | hsa-miR-1285-3p  | 28.91 | hsa-miR-619-5p    | 6.10 |
| hsa-miR-206       | 303.78 | hsa-miR-155-3p   | 28.83 | hsa-miR-766-5p    | 6.06 |
| hsa-miR-153-3p    | 302.22 | hsa-miR-143-5p   | 28.82 | hsa-miR-378i      | 6.00 |
| hsa-miR-1296-5p   | 297.92 | hsa-miR-589-3p   | 28.16 | hsa-miR-1185.1-3p | 5.96 |
| hsa-miR-744-5p    | 291.39 | hsa-miR-362-3p   | 28.08 | hsa-miR-548b-5p   | 5.94 |
| hsa-miR-363-3p    | 290.84 | hsa-miR-615-3p   | 27.85 | hsa-miR-365b-5p   | 5.89 |
| hsa-miR-338-3p    | 286.05 | hsa-miR-425-3p   | 27.52 | hsa-miR-211-5p    | 5.87 |
| hsa-miR-28-5p     | 282.55 | hsa-let-7g-3p    | 27.31 | hsa-miR-1226-3p   | 5.86 |
| hsa-miR-196a-5p   | 273.54 | hsa-miR-454-5p   | 26.65 | hsa-miR-3613-3p   | 5.84 |
| hsa-miR-409-3p    | 252.68 | hsa-miR-501-5p   | 26.63 | hsa-miR-670-3p    | 5.82 |
| hsa-miR-373-3p    | 244.30 | hsa-miR-223-5p   | 26.36 | hsa-miR-1910-5p   | 5.81 |
| hsa-miR-889-3p    | 235.73 | hsa-let-7b-3p    | 26.33 | hsa-miR-4517      | 5.79 |
| hsa-miR-221-5p    | 232.85 | hsa-miR-574-5p   | 26.24 | hsa-miR-1179      | 5.78 |
| hsa-miR-1224-5p   | 230.84 | hsa-miR-500a-5p  | 26.02 | hsa-miR-7976      | 5.77 |
| hsa-miR-574-3p    | 229.12 | hsa-miR-652-5p   | 25.98 | hsa-miR-4446-3p   | 5.68 |
| hsa-miR-219a-5p   | 228.20 | hsa-miR-1185-5p  | 25.28 | hsa-miR-4433b-3p  | 5.66 |
| hsa-miR-149-5p    | 227.79 | hsa-miR-518b     | 24.81 | hsa-miR-135b-3p   | 5.59 |
| hsa-miR-941       | 223.84 | hsa-miR-493-3p   | 24.67 | hsa-miR-3117-3p   | 5.59 |
| hsa-miR-454-3p    | 223.43 | hsa-miR-512-3p   | 24.20 | hsa-miR-219a.1-3p | 5.58 |
| hsa-miR-374a-5p   | 223.28 | hsa-miR-214-5p   | 23.92 | hsa-miR-6511a-3p  | 5.48 |
| hsa-miR-652-3p    | 219.80 | hsa-miR-503-5p   | 23.89 | hsa-miR-504-5p    | 5.44 |
| hsa-miR-509.3-5p  | 218.42 | hsa-miR-505-5p   | 23.76 | hsa-miR-3620-3p   | 5.35 |
| hsa-miR-598-3p    | 217.57 | hsa-miR-129.1-3p | 23.44 | hsa-miR-665       | 5.30 |
| hsa-miR-374b-5p   | 217.43 | hsa-miR-323b-3p  | 23.39 | hsa-miR-190a-3p   | 5.27 |
| hsa-miR-197-3p    | 213.92 | hsa-miR-100-3p   | 23.33 | hsa-miR-548g-3p   | 5.26 |
| hsa-miR-376c-3p   | 213.13 | hsa-miR-29b.2-5p | 23.28 | hsa-miR-487a-5p   | 5.10 |
| hsa-let-7d-3p     | 197.06 | hsa-miR-202-5p   | 23.22 | hsa-miR-518e-3p   | 5.04 |
| hsa-miR-1307-3p   | 195.58 | hsa-miR-490-3p   | 23.21 |                   |      |
| hsa-miR-184       | 191.33 | hsa-miR-3607-3p  | 23.16 |                   |      |

**Table S3. The 181 publicly available small RNA libraries for human tissues and cell lines**

| Accession.ID | Sample                   | Accession.ID | Sample                        | Accession.ID | Sample                        |
|--------------|--------------------------|--------------|-------------------------------|--------------|-------------------------------|
| SRR772343    | adipose tissue           | SRR772350    | adipose tissue                | SRR772376    | adipose tissue                |
| SRR772381    | adipose tissue           | SRR772414    | adipose tissue                | SRR772416    | adipose tissue                |
| SRR772418    | adipose tissue           | SRR772427    | adipose tissue                | SRR772435    | adipose tissue                |
| SRR772437    | adipose tissue           | SRR772453    | adipose tissue                | SRR772461    | adipose tissue                |
| SRR772472    | adipose tissue           | SRR772475    | adipose tissue                | SRR772499    | adipose tissue                |
| SRR772509    | adipose tissue           | SRR772511    | adipose tissue                | SRR772512    | adipose tissue                |
| SRR772528    | adipose tissue           | SRR772560    | adipose tissue                | SRR772589    | adipose tissue                |
| SRR772593    | adipose tissue           | SRR772595    | adipose tissue                | SRR772605    | adipose tissue                |
| SRR772620    | adipose tissue           | SRR772623    | adipose tissue                | SRR772624    | adipose tissue                |
| SRR772631    | adipose tissue           | SRR772657    | adipose tissue                | SRR772667    | adipose tissue                |
| SRR772674    | adipose tissue           | SRR772675    | adipose tissue                | SRR772678    | adipose tissue                |
| SRR772681    | adipose tissue           | SRR1028924   | alpha cell                    | SRR1012314   | B-cell lymphoma               |
| SRR1012315   | B-cell lymphoma          | SRR1012316   | B-cell lymphoma               | SRR1012318   | B-cell lymphoma               |
| SRR1012328   | B-cell lymphoma          | SRR1028925   | beta cell                     | DRR013040    | bladder cancer                |
| DRR013042    | bladder cancer           | DRR013043    | bladder cancer                | DRR013044    | bladder cancer                |
| DRR013039    | bladder epithelia        | SRR804662    | blood                         | SRR804669    | Blood                         |
| SRR804672    | Blood                    | SRR804676    | blood                         | SRR804678    | Blood                         |
| SRR804682    | Blood                    | SRR804688    | blood                         | SRR353655    | blood cell                    |
| SRR353656    | blood cell               | SRR353657    | blood cell                    | SRR353659    | blood cell                    |
| ERR038406    | Brain                    | ERR038407    | brain                         | ERR038409    | Brain                         |
| SRR1103939   | Brain                    | SRR1103941   | brain                         | SRR1103942   | Brain                         |
| SRR1103946   | Brain                    | SRR1103948   | brain                         | SRR095854    | Brain                         |
| SRR531683    | Brain embryonal tumor    | SRR531684    | Brain embryonal tumor         | SRR531685    | Brain embryonal tumor         |
| SRR531686    | Brain embryonal tumor    | SRR531707    | Brain embryonal tumor         | SRR531708    | Brain embryonal tumor         |
| SRR531709    | Brain embryonal tumor    | SRR531713    | Brain embryonal tumor         | SRR531687    | Brain germ cell tumor         |
| SRR531688    | Brain germ cell tumor    | SRR531689    | Brain germ cell tumor         | SRR531690    | Brain germ cell tumor         |
| SRR531691    | Brain germ cell tumor    | SRR531711    | Brain germ cell tumor         | SRR531715    | Brain germ cell tumor         |
| SRR531692    | Brain glioma             | SRR531693    | Brain glioma                  | SRR531694    | Brain glioma                  |
| SRR531695    | Brain glioma             | SRR531696    | Brain glioma                  | SRR531697    | Brain glioma                  |
| SRR531698    | Brain glioma             | SRR531699    | Brain glioma                  | SRR531700    | Brain glioma                  |
| SRR531701    | Brain glioma             | SRR531702    | Brain glioma                  | SRR531703    | Brain glioma                  |
| SRR531704    | Brain glioma             | SRR531705    | Brain glioma                  | SRR531706    | Brain glioma                  |
| SRR531710    | Brain glioma             | SRR1024134   | Cingulate gyrus (grey matter) | SRR1024136   | Cingulate gyrus (grey matter) |
| SRR1012319   | follicle center lymphoma | SRR1012320   | follicle lymphoma             | ERR038425    | Heart                         |
| SRR1241600   | HEK293T cell             | SRR1241604   | HEK293T cell                  | SRR1241605   | HEK293T cell                  |
| SRR1241606   | HEK293T cell             | SRR1241607   | HEK293T cell                  | SRR1241608   | HEK293T cell                  |
| SRR1241609   | HEK293T cell             | SRR1241612   | HEK293T cell                  | SRR1241613   | HEK293T cell                  |
| SRR628450    | Hela cell                | SRR628451    | Hela cell                     | SRR628453    | Hela cell                     |
| SRR628454    | Hela cell                | ERR038420    | kidney                        | ERR038421    | Kidney                        |
| ERR038422    | Kidney                   | ERR038412    | liver                         | SRR950887    | liver + miR-302d              |

|            |                                |            |                                  |            |                               |
|------------|--------------------------------|------------|----------------------------------|------------|-------------------------------|
| SRR372612  | Lung                           | SRR372614  | Lung                             | SRR372615  | Lung                          |
| SRR372616  | Lung                           | SRR372618  | Lung                             | SRR372619  | Lung                          |
| SRR372620  | Lung                           | SRR372621  | Lung                             | SRR372622  | Lung                          |
| SRR372623  | Lung                           | SRR372624  | Lung                             | SRR372625  | Lung                          |
| SRR372626  | Lung                           | SRR372628  | Lung                             | SRR372631  | Lung                          |
| SRR372632  | Lung                           | SRR372635  | Lung                             | SRR372637  | Lung                          |
| SRR372639  | Lung                           | SRR372640  | Lung                             | SRR372641  | Lung                          |
| SRR372643  | Lung                           | SRR372646  | Lung                             | SRR372647  | Lung                          |
| SRR1013967 | Lung Cancer Cell Line<br>A549  | SRR1013979 | Lung Cancer Cell Line<br>H1264   | SRR1013971 | Lung Cancer Cell Line<br>H460 |
| SRR1013975 | Lung Cancer Cell Line<br>H520  | SRR1013983 | Lung Cancer Cell Line<br>RVH6849 | SRR1013969 | Lung Xenograft A549           |
| SRR1013981 | Lung Xenograft H1264           | SRR1013973 | Lung Xenograft H460              | SRR1013978 | Lung Xenograft H520           |
| SRR1013985 | Lung Xenograft<br>RVH6849      | SRR592690  | lymphoblastoid cells             | SRR592692  | lymphoblastoid cells          |
| SRR592693  | lymphoblastoid cells           | SRR592694  | lymphoblastoid cells             | SRR592695  | lymphoblastoid cells          |
| SRR1290798 | lymphoblastoid SUP-T1<br>cells | SRR1290809 | lymphoblastoid SUP-T1<br>cells   | SRR873389  | MCF-7 cell                    |
| SRR060986  | memory B cell                  | SRR950877  | miRQC A repeat                   | SRR950878  | miRQC B                       |
| SRR950881  | miRQC C repeat                 | SRR950883  | miRQC D repeat                   | SRR060985  | naive B cell                  |
| SRR015358  | Naive B Cell(Naive39)          | SRR1028933 | whole islet                      | SRR926589  | Peripheral blood              |
| SRR1012334 | peripheral blood B-cells       | SRR060983  | pre-germinal center B<br>cell    | SRR491355  | Renal                         |
| SRR1028935 | whole islet                    | ERR328151  | testis                           | SRR1028926 | whole islet                   |
| SRR1028927 | whole islet                    | SRR1028930 | whole islet                      | SRR1028931 | whole islet                   |
| SRR1028932 | whole islet                    |            |                                  |            |                               |

---

These small RNA libraries were downloaded from the NCBI SRA website

([www.ncbi.nlm.nih.gov/sra](http://www.ncbi.nlm.nih.gov/sra), last accessed 16 May 2016).

**Table S4. The publicly available small RNA libraries for tissues of five species**

| Accession.ID | Sample                 | Accession.ID | Sample               | Accession.ID | Sample                 |
|--------------|------------------------|--------------|----------------------|--------------|------------------------|
| SRR553572    | Human Frontal Cortex   | SRR553573    | Human Cerebellum     | SRR553574    | Human Heart            |
| SRR553575    | Human Kidney           | SRR553576    | Human Testis         | SRR553577    | Macaque Frontal Cortex |
| SRR553578    | Macaque Cerebellum     | SRR553579    | Macaque Heart        | SRR553580    | Macaque Kidney         |
| SRR553581    | Macaque Testis         | SRR553582    | Mouse Frontal Cortex | SRR553583    | Mouse Cerebellum       |
| SRR553584    | Mouse Heart            | SRR553585    | Mouse Kidney         | SRR553586    | Mouse Testis           |
| SRR553587    | Opossum Frontal Cortex | SRR553588    | Opossum Cerebellum   | SRR553589    | Opossum Heart          |
| SRR553590    | Opossum Kidney         | SRR553591    | Opossum Testis       | SRR553597    | Chicken Frontal Cortex |
| SRR553598    | Chicken Cerebellum     | SRR553600    | Chicken Kidney       | SRR553601    | Chicken Testis         |
| SRR553599    | Chicken Heart          |              |                      |              |                        |

**Table S5. The numbers of canonical target sites for the broadly conserved SCUmIRs and DmiR families**

| Family   | Mature miRNAs                                             | Seed    | Category    | All targets | P <sub>CT</sub> > 0.5 | Fraction (P <sub>CT</sub> > 0.5) |
|----------|-----------------------------------------------------------|---------|-------------|-------------|-----------------------|----------------------------------|
| mir-122  | miR-122-5p                                                | GGAGTGT | hetero-seed | 6883        | 15                    | 0.002                            |
| mir-214  | miR-214-3p                                                | CAGCAGG | hetero-seed | 9111        | 0                     | 0.000                            |
| mir-216  | miR-216a-5p                                               | AATCTCA | hetero-seed | 5546        | 103                   | 0.019                            |
| mir-216  | miR-216b-5p                                               | AATCTCT | hetero-seed | 5253        | 97                    | 0.018                            |
| mir-10   | miR-100-5p/99a-5p/99b-5p                                  | ACCCGTA | HH-seed     | 374         | 0                     | 0.000                            |
| mir-10   | miR-10a-5p/10b-5p                                         | ACCCTGT | HH-seed     | 4736        | 166                   | 0.035                            |
| mir-10   | miR-125b-5p                                               | CCCTGAG | HH-seed     | 6400        | 717                   | 0.112                            |
| mir-17   | miR-106a-5p/106b-5p/17-5p/20a-5p/20b-5p/93-5p             | AAAGTGC | HH-seed     | 9459        | 1219                  | 0.129                            |
| mir-17   | miR-18a-5p/18b-5p                                         | AAGGTGC | HH-seed     | 3473        | 143                   | 0.041                            |
| mir-219  | miR-219a-5p                                               | GATTGTC | HH-seed     | 2839        | 332                   | 0.117                            |
| mir-34   | miR-34a-5p/34c-5p                                         | GGCAGTG | HH-seed     | 5826        | 661                   | 0.113                            |
| mir-34   | miR-34b-5p                                                | AGGCAGT | HH-seed     | 5296        | 0                     | 0.000                            |
| mir-449  | miR-449a/449b-5p                                          | GGCAGTG | HH-seed     | 5826        | 661                   | 0.113                            |
| mir-8    | miR-200b-3p/200c-3p/429                                   | AATACTG | HH-seed     | 6666        | 836                   | 0.125                            |
| mir-8    | miR-141-3p/200a-3p                                        | AACACTG | HH-seed     | 6905        | 225                   | 0.033                            |
| let-7    | let-7a-5p/7b-5p/7c-5p/7d-5p/7e-5p/7f-5p/7g-5p/7i-5p/98-5p | GAGGTAG | homo-seed   | 4129        | 1266                  | 0.307                            |
| mir-1    | miR-1-3p/206                                              | GGAATGT | homo-seed   | 5559        | 782                   | 0.141                            |
| mir-101  | miR-101-3p                                                | ACAGTAC | homo-seed   | 5537        | 516                   | 0.093                            |
| mir-103  | miR-103a-3p/107                                           | GCAGCAT | homo-seed   | 6035        | 433                   | 0.072                            |
| mir-124  | miR-124-3p                                                | AAGGCAC | homo-seed   | 5898        | 1969                  | 0.334                            |
| mir-128  | miR-128-3p                                                | CACAGTG | homo-seed   | 8148        | 947                   | 0.116                            |
| mir-129  | miR-129-5p                                                | TTTTTGC | homo-seed   | 14645       | 0                     | 0.000                            |
| mir-130  | miR-130a-3p/130b-3p/301a-3p/301b-3p                       | AGTGCAA | homo-seed   | 4856        | 962                   | 0.198                            |
| mir-132  | miR-132-3p/212-3p                                         | AACAGTC | homo-seed   | 5029        | 131                   | 0.026                            |
| mir-133  | miR-133a-3p/133b                                          | TTGGTCC | homo-seed   | 3567        | 647                   | 0.181                            |
| mir-135  | miR-135a-5p/135b-5p                                       | ATGGCTT | homo-seed   | 4875        | 644                   | 0.132                            |
| mir-138  | miR-138-5p                                                | GCTGGTG | homo-seed   | 5306        | 473                   | 0.089                            |
| mir-146  | miR-146a-5p/146b-5p                                       | GAGAACT | homo-seed   | 5087        | 0                     | 0.000                            |
| mir-148  | miR-148a-3p/148b-3p/152-3p                                | CAGTGCA | homo-seed   | 5110        | 567                   | 0.111                            |
| mir-15   | miR-15a-5p/15b-5p/16-5p/195-5p                            | AGCAGCA | homo-seed   | 7661        | 1474                  | 0.192                            |
| mir-153  | miR-153-3p                                                | TGCATAG | homo-seed   | 4180        | 805                   | 0.193                            |
| mir-181  | miR-181a-5p/181b-5p/181d-5p                               | ACATTCa | homo-seed   | 7605        | 937                   | 0.123                            |
| mir-19   | miR-19a-3p/19b-3p                                         | GTGCAAA | homo-seed   | 5120        | 1204                  | 0.235                            |
| mir-190  | miR-190a-5p/190b                                          | GATATGT | homo-seed   | 3133        | 31                    | 0.010                            |
| mir-192  | miR-192-5p/215-5p                                         | TGACCTA | homo-seed   | 3145        | 0                     | 0.000                            |
| mir-193  | miR-193a-3p/193b-3p                                       | ACTGGCC | homo-seed   | 3542        | 74                    | 0.021                            |
| mir-194  | miR-194-5p                                                | GTAACAG | homo-seed   | 4977        | 193                   | 0.039                            |
| mir-196  | miR-196a-5p/196b-5p                                       | AGGTAGT | homo-seed   | 2665        | 265                   | 0.099                            |
| mir-199  | miR-199a-5p/199b-5p                                       | CCAGTGT | homo-seed   | 5533        | 346                   | 0.063                            |
| mir-199  | miR-199a-3p/199b-3p                                       | CAGTAGT | homo-seed   | 3669        | 347                   | 0.095                            |
| mir-204  | miR-204-5p/211-5p                                         | TCCTTTT | homo-seed   | 7779        | 0                     | 0.000                            |
| mir-208  | miR-208a-3p/208b-3p                                       | TAAGACG | homo-seed   | 2967        | 0                     | 0.000                            |
| mir-218  | miR-218-5p                                                | TGTGCTT | homo-seed   | 5233        | 978                   | 0.187                            |
| mir-221  | miR-221-3p/222-3p                                         | GCTACAT | homo-seed   | 3796        | 181                   | 0.048                            |
| mir-23   | miR-23a-3p/23b-3p                                         | TCACATT | homo-seed   | 8284        | 279                   | 0.034                            |
| mir-24   | miR-24-3p                                                 | GGCTCAG | homo-seed   | 10528       | 264                   | 0.025                            |
| mir-25   | miR-25-3p/92a-3p/92b-3p                                   | ATTGCAC | homo-seed   | 5184        | 966                   | 0.186                            |
| mir-26   | miR-26a-5p/26b-5p                                         | TCAAGTA | homo-seed   | 6607        | 0                     | 0.000                            |
| mir-27   | miR-27a-3p/27b-3p                                         | TCACAGT | homo-seed   | 7660        | 1097                  | 0.143                            |
| mir-29   | miR-29a-3p/29b-3p/29c-3p                                  | AGCACCA | homo-seed   | 4495        | 1289                  | 0.287                            |
| mir-30   | miR-30a-5p/30b-5p/30c-5p/30d-5p/30e-5p                    | GTAAACA | homo-seed   | 5770        | 1595                  | 0.276                            |
| mir-302  | miR-302a-3p/302b-3p/302c-3p/302d-3p                       | AAGTGCT | homo-seed   | 8109        | 777                   | 0.096                            |
| mir-33   | miR-33a-5p/33b-5p                                         | TGCATTG | homo-seed   | 5540        | 22                    | 0.004                            |
| mir-365  | miR-365a-3p/365b-3p                                       | AATGCCC | homo-seed   | 3558        | 79                    | 0.022                            |
| mir-7    | miR-7-5p                                                  | GGAAGAC | homo-seed   | 6789        | 245                   | 0.036                            |
| mir-9    | miR-9-5p                                                  | CTTTGGT | homo-seed   | 5948        | 1331                  | 0.224                            |
| mir-21   | miR-21-5p                                                 | AGCTTAT | Convergence | 3302        | 141                   | 0.043                            |
| mir-32   | miR-32-5p                                                 | ATTGCAC | Convergence | 5184        | 966                   | 0.186                            |
| mir-363  | miR-363-3p                                                | ATTGCAC | Convergence | 5184        | 966                   | 0.186                            |
| mir-367  | miR-367-3p                                                | ATTGCAC | Convergence | 5184        | 966                   | 0.186                            |
| mir-454  | miR-454-3p                                                | AGTGCAA | Convergence | 4856        | 962                   | 0.198                            |
| mir-96   | miR-96-5p                                                 | TTGGCAC | Convergence | 5321        | 1206                  | 0.227                            |
| mir-126  | miR-126-3p                                                | CGTACCG | SC-unique   | 240         | 0                     | 0.000                            |
| mir-1306 | miR-1306-5p                                               | CACCTCC | SC-unique   | 6492        | 0                     | 0.000                            |
| mir-137  | miR-137                                                   | TATTGCT | SC-unique   | 4609        | 1244                  | 0.270                            |
| mir-140  | miR-140-5p                                                | AGTGGTT | SC-unique   | 3659        | 242                   | 0.066                            |
| mir-142  | miR-142-5p                                                | ATAAAGT | SC-unique   | 8094        | 229                   | 0.028                            |
| mir-143  | miR-143-3p                                                | GAGATGA | SC-unique   | 6643        | 64                    | 0.010                            |
| mir-144  | miR-144-3p                                                | ACAGTAT | SC-unique   | 6336        | 242                   | 0.038                            |
| mir-145  | miR-145-5p                                                | TCCAGTT | SC-unique   | 5992        | 628                   | 0.105                            |
| mir-150  | miR-150-5p                                                | CTCCCAA | SC-unique   | 11817       | 0                     | 0.000                            |
| mir-155  | miR-155-5p                                                | TAATGCT | SC-unique   | 4284        | 123                   | 0.029                            |

|         |             |          |           |      |     |       |
|---------|-------------|----------|-----------|------|-----|-------|
| mir-182 | miR-182-5p  | TTGGCAA  | SC-unique | 5922 | 989 | 0.167 |
| mir-183 | miR-183-5p  | ATGGCAC  | SC-unique | 4359 | 280 | 0.064 |
| mir-184 | miR-184     | GGACGGA  | SC-unique | 1087 | 0   | 0.000 |
| mir-187 | miR-187-3p  | CGTGTCT  | SC-unique | 888  | 0   | 0.000 |
| mir-191 | miR-191-5p  | AACGGAA  | SC-unique | 843  | 0   | 0.000 |
| mir-202 | miR-202-5p  | TCCTATG  | SC-unique | 4418 | 0   | 0.000 |
| mir-205 | miR-205-5p  | CCTTCAT  | SC-unique | 5976 | 85  | 0.014 |
| mir-210 | miR-210-3p  | TGTGCGT  | SC-unique | 898  | 0   | 0.000 |
| mir-217 | miR-217     | ACTGCAT  | SC-unique | 5379 | 59  | 0.011 |
| mir-22  | miR-22-3p   | AGCTGCC  | SC-unique | 4743 | 349 | 0.074 |
| mir-223 | miR-223-3p  | GTCAGTT  | SC-unique | 3910 | 6   | 0.002 |
| mir-31  | miR-31-5p   | GGCAAGA  | SC-unique | 5147 | 68  | 0.013 |
| mir-338 | miR-338-3p  | CCAGCAT  | SC-unique | 6351 | 0   | 0.000 |
| mir-375 | miR-375     | TTGTTTCG | SC-unique | 4057 | 0   | 0.000 |
| mir-383 | miR-383-5p  | GATCAGA  | SC-unique | 3337 | 0   | 0.000 |
| mir-425 | miR-425-5p  | ATGACAC  | SC-unique | 4473 | 0   | 0.000 |
| mir-451 | miR-451a    | AACCGTT  | SC-unique | 558  | 0   | 0.000 |
| mir-455 | miR-455-5p  | ATGTGCC  | SC-unique | 3723 | 75  | 0.020 |
| mir-490 | miR-490-5p  | CATGGAT  | SC-unique | 4201 | 0   | 0.000 |
| mir-499 | miR-499a-5p | TAAGACT  | SC-unique | 4285 | 0   | 0.000 |
| mir-129 | miR-129-3p  | AGCCCTT  | homo-seed | 3789 | 298 | 0.079 |

SCUmiR: single-copy miRNAs that have unique seeds.

Only the miRNAs that are broadly conserved and originated before the split of mammals and fish/bird/frog are considered.

The target sites were downloaded from the TargetScan7.0 website ([www.targetscan.org](http://www.targetscan.org)), and all the three types of target sites (8mer, 7mer-A1 and 7mer-m8) were considered.



**Table S6. Summary of mRNA-seq data in the cellular transfection experiments in this study**

| <b>Samples</b>          | <b>Total reads</b> | <b>Mapping rate<br/>(%)</b> | <b>Unique mapping<br/>rate (%)</b> |
|-------------------------|--------------------|-----------------------------|------------------------------------|
| 293FT _mock-rep1        | 12,910,622         | 89.74                       | 62.45                              |
| 293FT _mock-rep2        | 20,093,471         | 90.10                       | 61.61                              |
| 293FT _NC-32h-rep1      | 54,547,365         | 91.88                       | 73.84                              |
| 293FT _NC-32h-rep2      | 12,249,445         | 89.73                       | 56.86                              |
| 293FT _let-7a-12h-rep1  | 35,711,844         | 91.94                       | 75.03                              |
| 293FT _let-7a-12h-rep2  | 10,917,691         | 92.59                       | 46.53                              |
| 293FT _let-7a-32h-rep1  | 36,819,475         | 91.23                       | 73.10                              |
| 293FT _let-7a-32h-rep2  | 18,815,462         | 84.23                       | 52.49                              |
| 293FT _let-7b-12h-rep1  | 51,464,381         | 91.88                       | 74.08                              |
| 293FT _let-7b-12h-rep2  | 23,167,851         | 93.80                       | 45.51                              |
| 293FT _let-7b-32h-rep1  | 55,993,539         | 90.39                       | 72.14                              |
| 293FT _let-7b-32h-rep2  | 19,824,065         | 91.03                       | 53.69                              |
| LLC-MK2_mock-rep1       | 11,439,785         | 89.63                       | 67.68                              |
| LLC-MK2_mock-rep2       | 11,633,984         | 89.62                       | 67.70                              |
| LLC-MK2_NC-32h-rep1     | 9,177,301          | 87.22                       | 66.64                              |
| LLC-MK2_NC-32h-rep2     | 9,356,480          | 87.19                       | 66.65                              |
| LLC-MK2_let-7a-32h-rep1 | 8,551,711          | 94.28                       | 71.33                              |
| LLC-MK2_let-7a-32h-rep2 | 8,440,910          | 94.32                       | 71.32                              |
| LLC-MK2_let-7b-32h-rep1 | 11,853,145         | 92.54                       | 69.90                              |
| LLC-MK2_let-7b-32h-rep2 | 11,570,514         | 92.50                       | 69.86                              |
| CV-1_mock-rep1          | 11,698,547         | 82.97                       | 69.73                              |
| CV-1_mock-rep2          | 11,547,428         | 83.57                       | 70.11                              |
| CV-1_NC-32h-rep1        | 7,305,436          | 82.09                       | 67.00                              |
| CV-1_NC-32h-rep2        | 7,532,426          | 81.92                       | 66.87                              |
| CV-1_let-7a-32h-rep1    | 11,285,902         | 84.97                       | 70.70                              |
| CV-1_let-7a-32h-rep2    | 11,388,888         | 84.97                       | 70.67                              |
| CV-1_let-7b-32h-rep1    | 8,382,903          | 84.54                       | 71.01                              |
| CV-1_let-7b-32h-rep2    | 8,340,124          | 84.55                       | 70.99                              |
| NRK_mock-rep1           | 10,100,682         | 92.85                       | 57.43                              |
| NRK_mock-rep2           | 10,283,414         | 92.82                       | 57.46                              |
| NRK_NC-32h-rep1         | 10,232,835         | 93.92                       | 54.22                              |
| NRK_NC-32h-rep2         | 18,770,931         | 94.38                       | 61.99                              |
| NRK_let-7a-32h-rep1     | 28,231,775         | 91.54                       | 47.64                              |
| NRK_let-7a-32h-rep2     | 38,518,472         | 91.59                       | 56.56                              |
| NRK_let-7b-32h-rep1     | 21,582,629         | 94.69                       | 60.98                              |
| NRK_let-7b-32h-rep2     | 21,034,315         | 93.22                       | 56.49                              |

**Table S7. Primers for qRT-PCR**

| <b>ID</b>      | <b>Oligo sequence (5'-to-3')</b> |
|----------------|----------------------------------|
| ACTB-F         | GCCAACCGCGAGAAGATGA              |
| ACTB-R         | CCAGAGGCGTACAGGGATAG             |
| EIF4G2-F       | GGTGGCAGCTGCTGAGTT               |
| EIF4G2-R       | CGGCTTGACAACGAAGAATC             |
| TIMM17B-F      | ACTATGGGTGTCATCGGTGG             |
| TIMM17B-R      | TCCTCACAGCATTGGCACTA             |
| SLC25A4-F      | AGAGGGTCAAACCTGCTGCTG            |
| SLC25A4-R      | CCCTGCTCCTTAGGGATTCT             |
| MAPK6-F        | TCGATGAGTCGGAGAAGTCC             |
| MAPK6-R        | TAGTGATCAGGTGGCTCCAG             |
| USP38-F        | ATGCAAGTATGACCCAAGCC             |
| USP38-R        | CAGTCCTTTCAGGAGTGCAA             |
| IGDCC4-F       | TTGACCTTCTGCCTGTTGG              |
| IGDCC4-R       | CAGGATCACTGCAGTGGC               |
| DCR1-F         | CTGAAACTGCAACGGACCTG             |
| DCR1-R         | GCCCACTTCTGTCAGTAAATGG           |
| TMEM8A-F       | AAACACACCGTCCATGATGC             |
| TMEM8A-R       | CGTTCACACAGGCCACTATG             |
| TARBP2-F       | GCCCACCAGCCTAATTCAC              |
| TARBP2-R       | CTTTGAGGTGTTTGAGGGCC             |
| TTL4-F         | GGTGGCCGTGATCTCTAGAA             |
| TTL4-R         | GGGAACGTTGGGAAAGAGAC             |
| PBX2-F         | ACATCTATGCTGTCAAGACCG            |
| PBX2-R         | GAGAGATTGAAAGAGCCGCC             |
| miR-221-3p-F*  | AGCTACATTGTCTGCTGGGTTTC          |
| miR-15-5p-F*   | TAGCAGCACATAATGGTTTGTG           |
| miR-103a-3p-F* | AGCAGCATTGTACAGGGCTATGA          |
| miR-17-5p-F*   | CAAAGTGCTTACAGTGCAGGTAG          |

\* The miRNA reverse primer was included in the Mir-X miRNA First-Strand Synthesis Kit.

**Table S8. Primers for luciferase reporter assays**

| <b>ID</b> | <b>Oligo sequence (5'-to-3')</b>          |
|-----------|-------------------------------------------|
| EIF4G2-F  | AAGGAAAAAAGCGGCCGAGAACCCAGCCAAAGCC        |
| EIF4G2-R  | CCGCTCGAGTCACTACATCAAGTATCAC              |
| TIMM17B-F | AAGGAAAAAAGCGGCCGCGGAAGCCACTGCCACCATGG    |
| TIMM17B-R | CCGCTCGAGGGCATTTCAAACGGGCTTTA             |
| SLC25A4-F | AAGGAAAAAAGCGGCCGCTGTAATTAACACAAAGTTCACAG |
| SLC25A4-R | CCGCTCGAGCCACCTCTGCCTCCCAAAGT             |
| MAPK6-F   | AAGGAAAAAAGCGGCCGCAACTCAGCAGACATTT        |
| MAPK6-R   | CCGCTCGAGTGTATTTGCTGGCCATG                |
| USP38-F   | AAGGAAAAAAGCGGCCGCTCTGAGAGAGTCCAAAATG     |
| USP38-R   | CCGCTCGAGCATCAGATTTTACTTCTGG              |
| IGDCC4-F  | AAGGAAAAAAGCGGCCGCTAGTGTTCTGTCTCCCAG      |
| IGDCC4-R  | CCGCTCGAGTCAAGTCAAGCCTCACAGG              |

## Supplementary Figures

### A Homo-seed family (*let-7*)

Guide (5p)

```

hsa-let-7a-1 -----UGGGAUGAGGUGAGUAGGUUUAUUUUUAGGGU-----CACACCCACCACUGGGAGAUUAACUAACAUCUACUGUCUUUUCCA-----
hsa-let-7f-2 -----UG.....A.....A.....G.....U.....AU.....U.....G.....C.....CG-----
hsa-let-7g -----A.....C.....U.....C.....GAG.....UCUAUG-AU.....CA.....CGGUACA.....G.....GG.....C.....C.....G.....A-----
hsa-let-7i -----CU.....C.....U.....GCU.....GG.....C.....UGUG-A.....UUG.....CG.....UG.....GCG.....G.....C.....G.....UA-----
hsa-let-7a-3 -----G.....G.....C.....C.....G.....C.....C.....G.....C.....C.....G.....C.....U.....UG.....CUGCU-AU.....G.....G.....C.....C.....G.....A-----
hsa-let-7f-1 -----UCA.....AG.....A.....G.....AGUG-AUUUUUA.....CUGUUA.....U.....C.....C.....GA-----
hsa-let-7b -----C.....G.....G.....G.....CAGUG-AUGUUU.....C-UUC.....A.....G.....C.....C.....C.....G-----
hsa-let-7d -----CC.....A.....A.....C.....CAGGG-AUUUUG.....C.....AA.....G.....G.....C.....G.....C.....U.....GG-----
hsa-let-7a-2 -----A.....U.....G.....AG.....AUUACA-----UCAAG-----G.....G.....C.....C.....AG-----
hsa-let-7c -----GCAUCC.....U.....G.....AG.....UUACA-----C.....UG-----U.....G.....C.....U.....AG.....UGGAGC-----
hsa-let-7e -----CCC.....C.....G.....GAGGA.....ACA-----C.....A.....C.....G.....C.....AG.....CCAGG-----
hsa-mir-98 -----AGGAUUCUGCUCAUGCCA.....G.....A.....U.....GUGG.....UAGGGAUUUAGG.....C.....A.....U.....A.....C.....CU.....A.....CUGGUGUGUGGCCAUUUUA

```

### B Hetero-seed family (*mir-188*)

Guide (5p)

```

hsa-mir-188 -----UGCUCUUCUUCUCAUCCCUUGCAUGGUGGAGGGGUGAGGUUUUCUGAAAACCCUCCCAUGCAGGGUUUGCAGGAUGGCGAGCC-----
hsa-mir-660 -----C.....U.....C.....U.....C.....A.....AUC.....U.....U.....A.....C.....A.....U.....G.....U.....A.....A.....U.....U.....UUGUCAUCUGU
hsa-mir-532 -----CGACU.....UU.....CUC.....G.....AG.....UA.....CC.....UG.....A.....CU.....A.....UU.....C.....C.....A.....C.....A.....A.....U-----

```

### C Homo-hetero-seed family (*mir-17*)

Guide (5p)

```

hsa-mir-93 -----CUGGGGGCUCAAGUGCUGUUCGUGCAGGUAGUGUGAUUACCC--AAACUACUGCUGAGCUAGCAGCUUCCGAGCCCGG-----
hsa-mir-106b -----C.....CC.....GG.....U.....ACA.....A.....GUCC.....CU.....GUG.....C.....ACU.....UGG.....U.....G.....U.....CU.....AG.....A.....G-----
hsa-mir-20b -----A.....UA.....CA.....A.....U.....UGGC.....UG-----CU.....U.....UA.....UAUG.....A.....UA.....U-----
hsa-mir-20a -----UA.....A.....U.....UA.....A.....UUAGUU-----U.....A.....AUUAUG.....AAA.....UA.....UG-----
hsa-mir-106a -----CCU.....CCAUGUA.....UACA.....CU.....UU.....G.....G.....U.....AAU.....UA.....UUACA.....U.....AUGG-----
hsa-mir-17 -----GUCAGAAUUAUGU.....UACA.....AU.....GUG-----U.....A.....U.....A.....G.....GUA.....CAUUUG.....UGAC-----
hsa-mir-18a -----U.....U.....U.....G.....AUC.....A.....AAG.....AGAUUAGC.....U.....CCUAA.....U.....C.....U.....U.....GCA-----
hsa-mir-18b -----U.....UGUU.....G.....AUC.....A.....U.....AAGCAG.....UUAG.....U.....CCUAA.....U.....C.....C.....U.....GCA-----

```

### D Convergence (*mir-21* and *mir-590*)

Guide (5p)

```

hsa-mir-21 -----UGUCGGG--UAGCUUAU-CAGACUGAUGUUGACUGUUGAAUCUCAUGGCAACACCAAGUCGAUGGGCUG--UCUGACA-----
hsa-mir-590 -----UAGCCA.....A.....AAAUG.....U.....U.....AAAG.....CA.....UA.....G.....GUCA.....CUGU.....AUUUUA.....GU.....AA.....AGUC.....UUGAAAACUAGCAGCA

```

## Figure S1. Examples of DmiR family of different categories (A-C) and convergence (D).

(A) *let-7* is a homo-seed family in which all miRNAs share common seed (GAGGUAG).

(B) *mir-188* is a hetero-seed family that all three miRNAs in this family have distinct seeds (*miR-188-5p*: AUCCCUU; *miR-660-5p*: ACCCAU; *miR-532-5p*: AUGCCCU).

(C) *mir-17* family is a homo-hetero-seed (HH-seed) family. Eight different miRNAs share three distinct seeds (*miR-17-5p/20a-5p/20b-5p/93-5p/106a-5p/106b-5p*: AAAGUGC; *miR-18a-5p/18b-5p*: AAGGUGC).

(D) *mir-21* and *mir-590* are not homologous in the precursor sequences but *miR-21-5p* and *miR-590-5p* share the same seed (AGCUUAU) due to convergent evolution. For each set of miRNAs, the sequence alignments of the precursors are shown. The mature sequences (guide strands) are in bold, and the seed sequences are in the red.

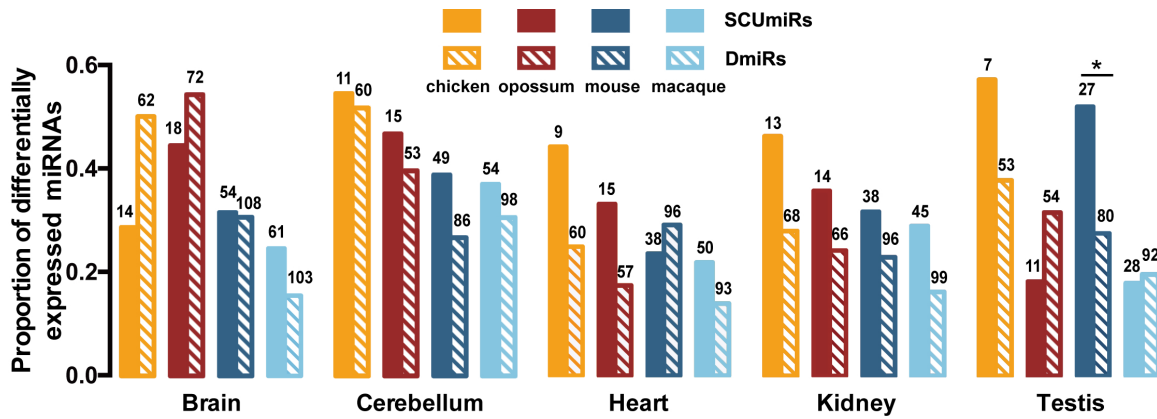

**Figure S2** The proportion of SCUmIRs and DmiRs that are differentially expressed by at least 4-fold (y-axis) in five tissues between human and macaque, mouse, opossum, or chicken. The number above each box represents the number of SCUmIRs and DmiRs that are conserved and expressed in both humans and the other species. The miRNAs that are conserved in the vertebrate species, whenever applicable, were considered in each comparison.

```

dme-miR-34-5p      .UGGCAGUGUGGUUAGCUGGUUGUG
hsa-miR-34a-5p    .UGGCAGUGUC.UUAGCUGGUUGU.
hsa-miR-34c-5p    .AGGCAGUGUAGUUAGCUGAUUGC.
hsa-miR-34b-5p    UAGGCAGUGUCAUUAGCUGAUUG..
                    *****  *****  ***

```

**Figure S3. Shifting of the seed sequence in *mir-34* family.** The seed of *dme-miR-34* and *has-miR-34a/34c* is GGCAGUG, whereas the seed of *has-miR-34b* is AGGCAGU due to one nucleotide shift. The *dme-miR-34* (from *D. melanogaster*) serves as outgroup and represents the ancestral state.

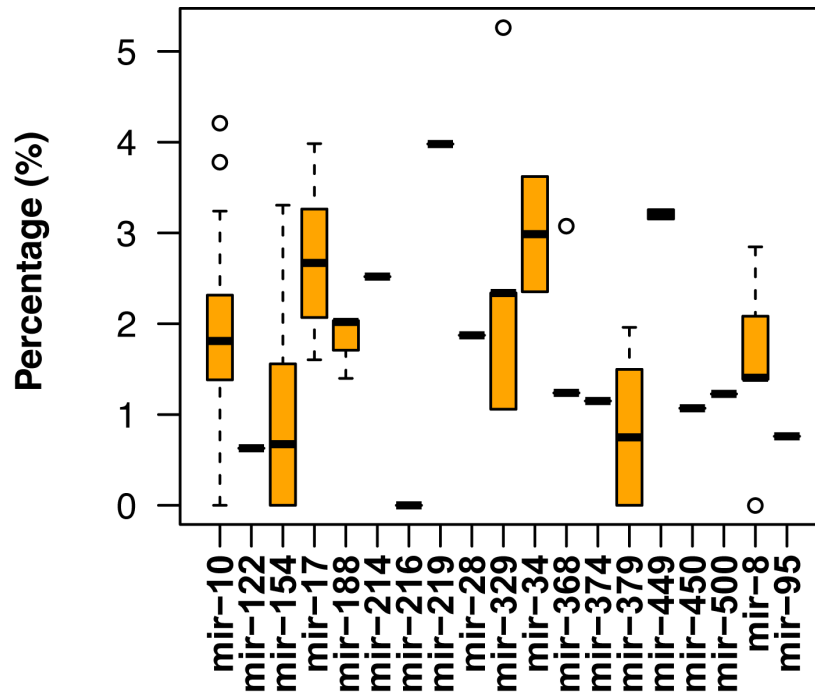

**Figure S4. Paralogous miRNAs that have different seeds share a very low fraction of target genes in common.** The *x*-axis is a distinct miRNA family, and the *y*-axis is the boxplot for the percentage (%) of the target sites shared between two paralogous miRNAs divided by the mean number of target sites for the two miRNAs. The target sites were predicted with TargetScan Context++ Score < -0.3.

**A**

SCUmiRs (30)

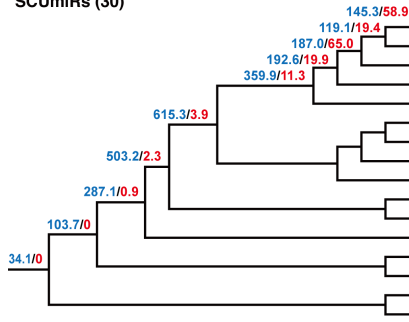

Homo-seed DmiR families (42)

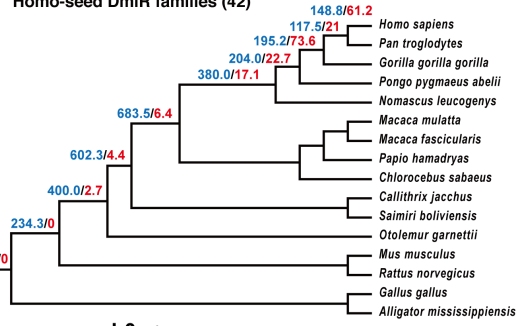

**B**

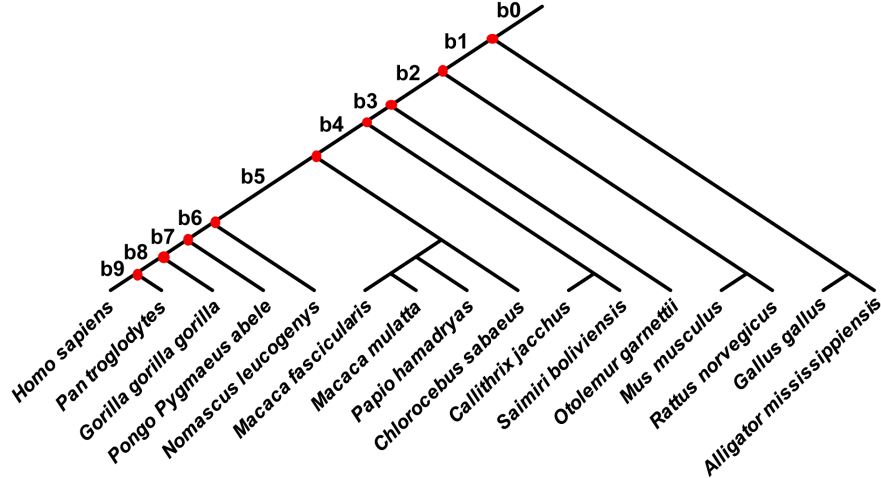

SCUmiRs (30)

| Seed    | Family   | b0  | b1  | b2  | b3   | b4   | b5   | b6  | b7  | b8  | b9  |
|---------|----------|-----|-----|-----|------|------|------|-----|-----|-----|-----|
| AACCGTT | mir-451  | 1   | 12  | 10  | 17   | 50   | 45   | 38  | 64  | 39  | 72  |
| AACGGAA | mir-191  | 4   | 23  | 30  | 46   | 83   | 89   | 69  | 115 | 71  | 109 |
| ACAGTAT | mir-144  | 96  | 133 | 403 | 679  | 753  | 495  | 244 | 259 | 149 | 173 |
| ACTGCAT | mir-217  | 30  | 81  | 317 | 554  | 752  | 468  | 240 | 276 | 145 | 214 |
| AGCTGCC | mir-22   | 46  | 225 | 513 | 726  | 752  | 382  | 231 | 208 | 107 | 159 |
| AGTGGTT | mir-140  | 31  | 121 | 360 | 473  | 612  | 298  | 151 | 194 | 91  | 129 |
| ATAAAGT | mir-142  | 80  | 239 | 626 | 919  | 1053 | 627  | 333 | 288 | 186 | 204 |
| ATGACAC | mir-425  | 17  | 67  | 225 | 427  | 602  | 354  | 175 | 197 | 105 | 138 |
| ATGGCAC | mir-183  | 73  | 103 | 245 | 390  | 497  | 386  | 196 | 216 | 155 | 164 |
| ATGTGCC | mir-455  | 16  | 62  | 176 | 398  | 525  | 365  | 194 | 221 | 137 | 164 |
| CACCTCC | mir-1306 | 5   | 90  | 393 | 789  | 1081 | 703  | 382 | 371 | 270 | 292 |
| CATGGAT | mir-490  | 6   | 40  | 239 | 433  | 544  | 303  | 194 | 196 | 102 | 117 |
| CCAGCAT | mir-338  | 24  | 94  | 280 | 628  | 740  | 464  | 270 | 281 | 161 | 188 |
| CCTTCAT | mir-205  | 38  | 117 | 287 | 547  | 715  | 378  | 224 | 187 | 92  | 118 |
| CGTACCG | mir-126  | 0   | 2   | 3   | 3    | 3    | 2    | 4   | 5   | 6   | 6   |
| CGTGTCT | mir-187  | 2   | 7   | 12  | 39   | 103  | 87   | 85  | 108 | 72  | 104 |
| CTCCCAA | mir-150  | 9   | 107 | 467 | 1695 | 2327 | 1373 | 705 | 529 | 566 | 467 |
| GAGATGA | mir-143  | 27  | 130 | 405 | 677  | 774  | 461  | 243 | 227 | 142 | 178 |
| GATCAGA | mir-383  | 3   | 55  | 270 | 425  | 465  | 233  | 120 | 125 | 51  | 91  |
| GGACGGA | mir-184  | 2   | 13  | 29  | 45   | 89   | 89   | 56  | 88  | 60  | 99  |
| GGCAAGA | mir-31   | 35  | 108 | 379 | 680  | 744  | 405  | 201 | 231 | 116 | 177 |
| GTCAGTT | mir-223  | 31  | 74  | 250 | 407  | 451  | 249  | 131 | 155 | 77  | 101 |
| TAAGACT | mir-499  | 27  | 74  | 316 | 514  | 551  | 317  | 163 | 144 | 80  | 104 |
| TAATGCT | mir-155  | 44  | 103 | 402 | 554  | 588  | 335  | 172 | 157 | 98  | 92  |
| TATTGCT | mir-137  | 194 | 292 | 357 | 469  | 509  | 324  | 163 | 107 | 87  | 93  |
| TCCAGTT | mir-145  | 78  | 199 | 439 | 630  | 715  | 396  | 198 | 206 | 139 | 175 |
| TCCTATG | mir-202  | 9   | 53  | 162 | 309  | 454  | 280  | 189 | 171 | 81  | 124 |
| TGTGCGT | mir-210  | 1   | 15  | 31  | 27   | 96   | 80   | 85  | 116 | 80  | 149 |
| TTGGCAA | mir-182  | 94  | 244 | 484 | 690  | 633  | 377  | 159 | 151 | 93  | 135 |
| TTGTTCC | mir-375  | 0   | 3   | 5   | 18   | 36   | 33   | 24  | 40  | 29  | 26  |

C

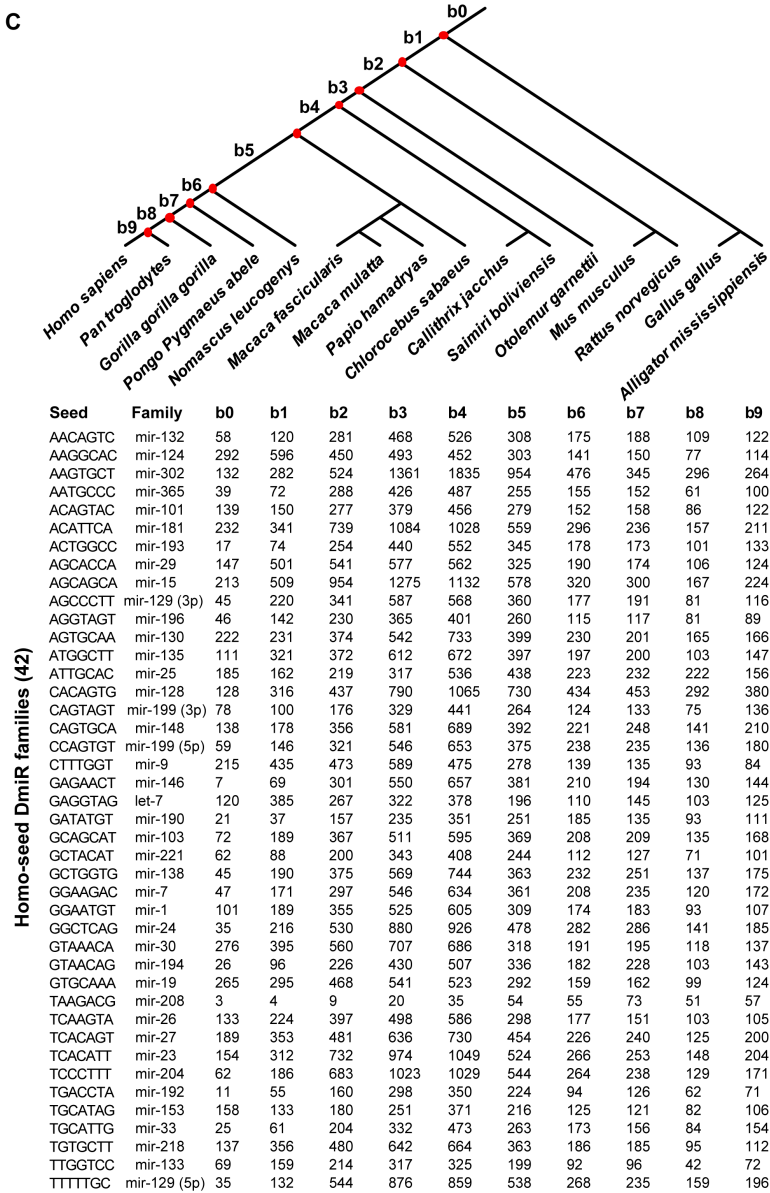

**Figure S5. The evolutionary dynamics of canonical target sites in the branches leading to extant humans for the broadly conserved SCUmRNAs (30 miRNAs) and homo-seed DmiR families (42 families). (A)** The average gains and losses of canonical target sites *per* seed in the branches leading to extant humans. The numbers of gain and loss events in each branch are in blue and red, respectively. The branch is named the same as in Fig. 4B. **(B-C)** the detailed net-gained target sites for each SCUmRNA **(B)** and homo-seed DmiR family **(C)**. Only the target sites with perfect seed matching (7mer-m8 and 8mer in TargetScan) were considered in the analysis. The number of target sites in branch b0 is the target sites that are ancient and conserved in all the 16 species.



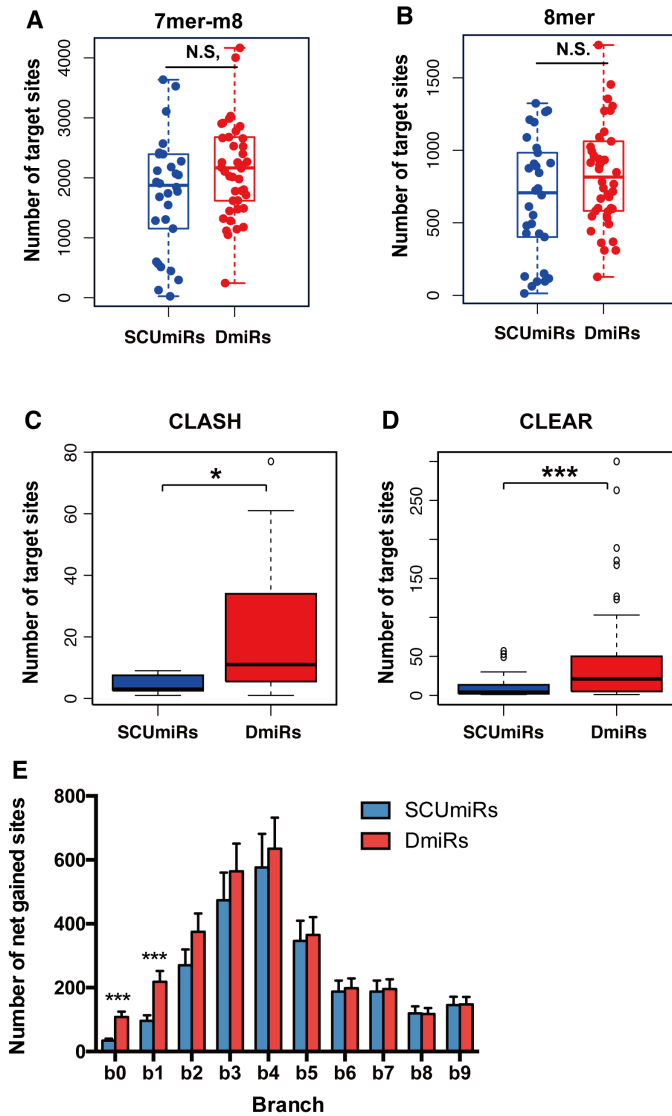

**Figure S6. The number of canonical target sites for the broadly conserved SCUMiRs and homo-seed DmiR families.**

(A-B) The distribution of type target sites; The boxplot of canonical target sites (7mer-m8, **A**; and 8mer, **B**) of the homo-seed DmiRs and SCUMiRs.

(C-D) The numbers of canonical target sites are significantly higher for the conserved homo-seed DmiRs than the SCUMiRs in the (C) CLASH and (D) CLEAR datasets.

(E) The average numbers of target sites that originated in the branches (b1-b9) and conserved in extant humans. For each branch, a WMW test was used to test whether there is a significant difference in the numbers of target sites for a homo-seed DmiR family and a SCUMiR (\*,  $P < 0.05$ ; \*\*\*,  $P < 0.001$ ). The number of target sites in b0 is the target sites (*per seed*) that are ancient and conserved in all the 16 species. The bars represent the standard errors.

N.S., not significant; \*,  $P < 0.05$ ; \*\*,  $P < 0.01$ ; \*\*\*,  $P < 0.001$ .

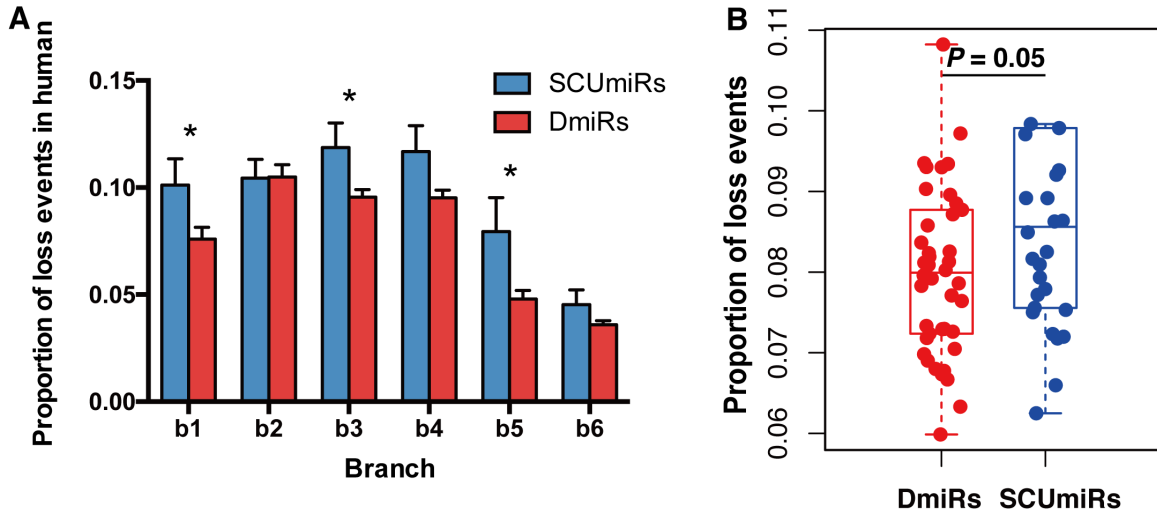

**Figure S7.** The proportion of target sites that were gained in the ancient branches but eventually lost in the offspring branches.

**(A)** The proportion of target sites gained in a branch [b1 to b6 as defined in (B)] but eventually lost in the offspring branches leading to extant humans. The proportion was calculated as the number of target sites that eventually got lost out of the total number of target sites originated in that branch. For each branch, a WMW test was used to test whether the proportion was statistically significantly different between SCUmiRs and homo-seed DmiR families (\*,  $P < 0.05$ ). The average proportion and the standard errors are given.

**(B)** Boxplot of the proportions of target sites that originated in branches b1-b6 (combined) but eventually lost in extant humans for the homo-seed DmiRs and SCUmiRs.

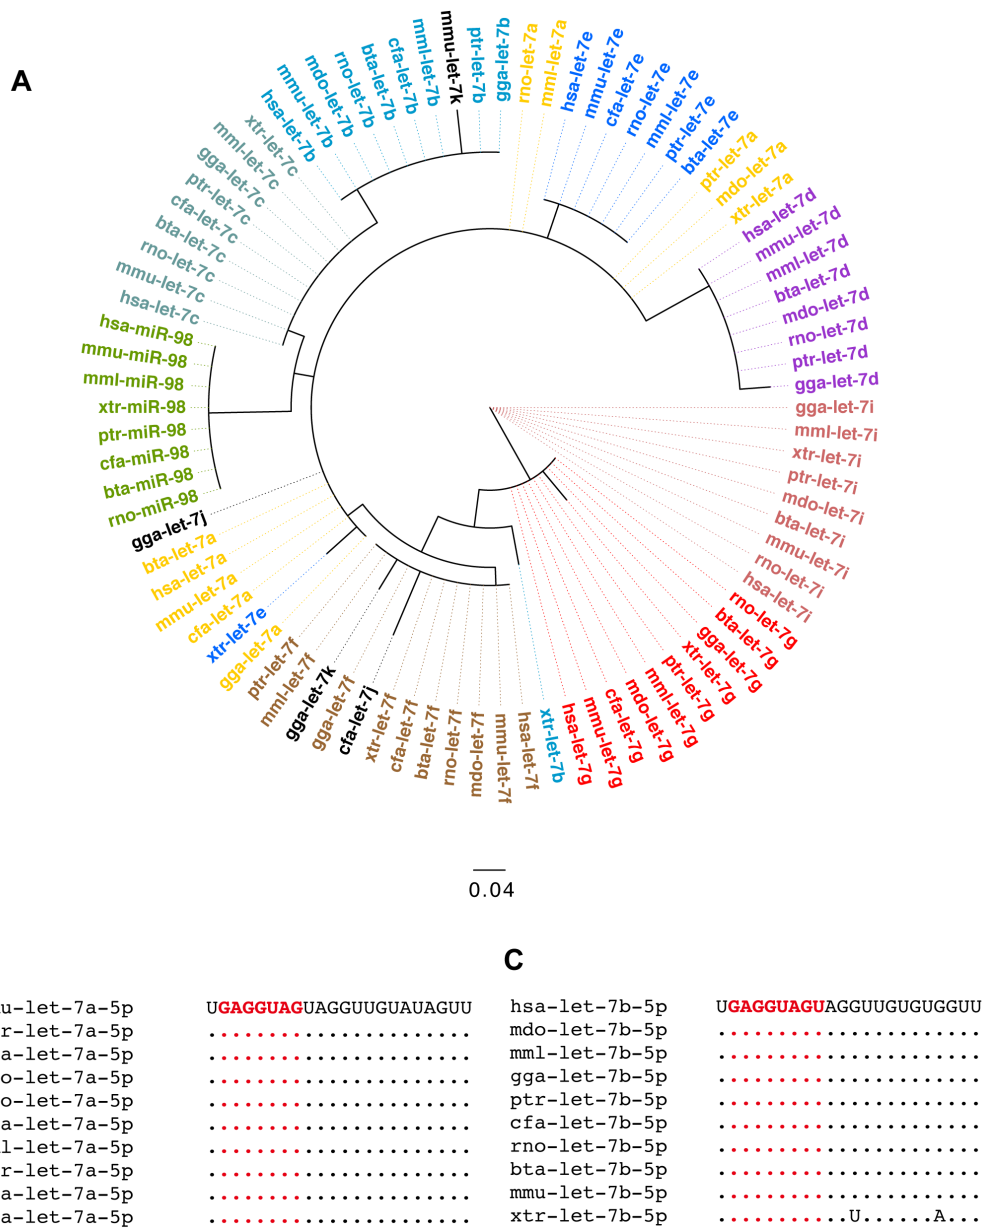

**Figure S8. The duplicated miRNAs in the *let-7* family are broadly conserved in vertebrates.**

(A) Phylogenetic tree of the vertebrate *let-7* family of miRNAs based on the mature sequences;

(B) Mature sequences alignment of *let-7a*;

(C) Mature sequences alignment of *let-7b*. (gga: chicken; xtr: frog; rno: rat; mmu: mouse; mdo: opossum; cfa: dog; bta: cow; mml: rhesus; ptr: chimpanzee; has: human).

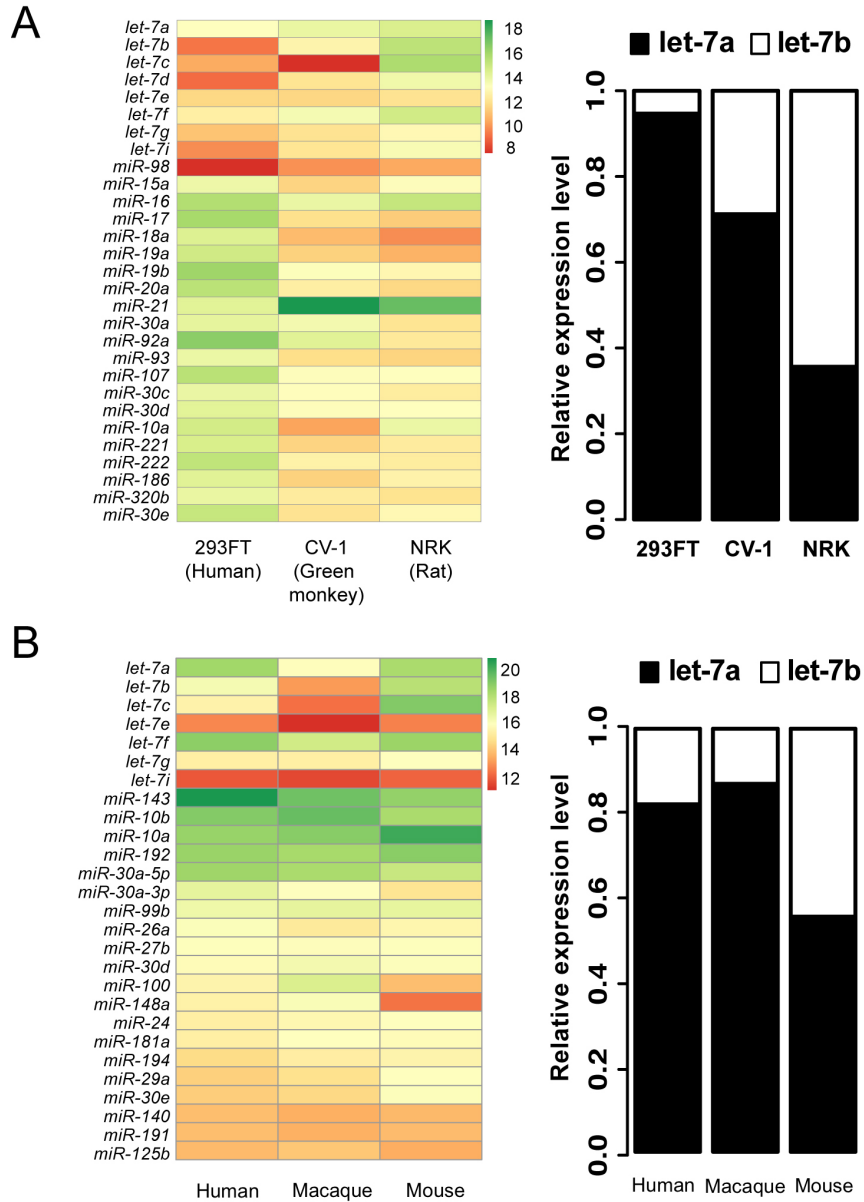

**Figure S9. Expression divergence between *let-7a* and *let-7b* in tissues and cell lines across species.**

(A) Expression profile of members of the *let-7* family and the top 20 most abundant miRNAs in the 293FT (human), CV-1 (green monkey) and NRK (rat) cell lines (left). The relative expression abundance of *let-7a* and *let-7b* in the three cells lines is presented in the right panel.

(B) Expression profile of *let-7* family members and the top 20 most abundant miRNAs in the human, macaque and mouse kidney (left). The relative expression abundance of *let-7a* and *let-7b* in the human, macaque and mouse kidney is presented in the right panel.

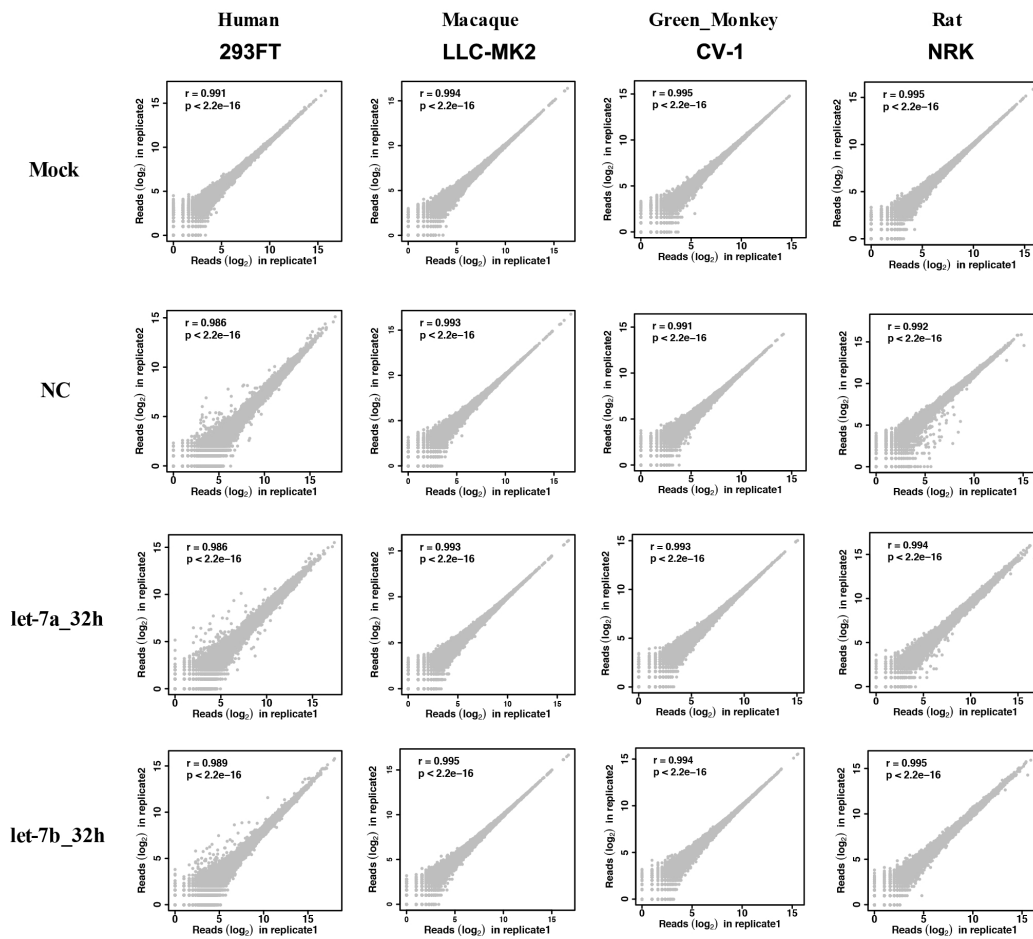

**Figure S10. Scatter plots depicting correlations in gene expression between replicates under all tested conditions.** The expression of all genes was well correlated between biological replicates (293FT and NRK) and technical replicates (LLC-MK2 and CV-1). “Mock” indicates cell lines treated with transfection reagents without any small RNA sequences; “NC” represents cell lines transfected with a small RNA duplex as the negative control; “*let-7a\_32h*” and “*let-7b\_32h*” represent cells transfected with *let-7a* or *let-7b*, respectively, for 32 h.

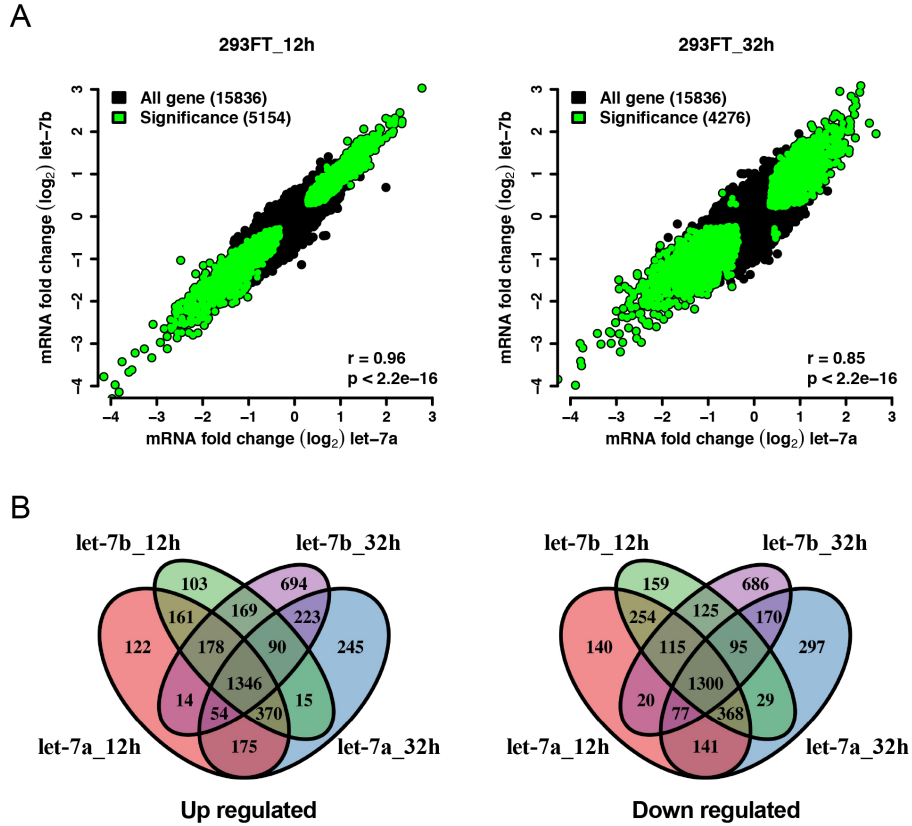

**Figure S11. Transcriptome sequencing of *let-7a* and *let-7b* transfected human cell lines (293FT).** (A) The fold change ( $\log_2$ ) of mRNA abundance in 293FT cells transfected with *let-7a* relative to *let-7b* after 12 h or 32 h. Green represents genes that showed significant changes in mRNA levels (FDR of 0.05), and black indicates all genes that showed changes in mRNA levels. (B) Venn diagram showing the number of genes with significantly up-regulated or down-regulated mRNA expression that were common or unique after 293FT cells were transfected with *let-7a* or *let-7b* for 12 h or 32 h.

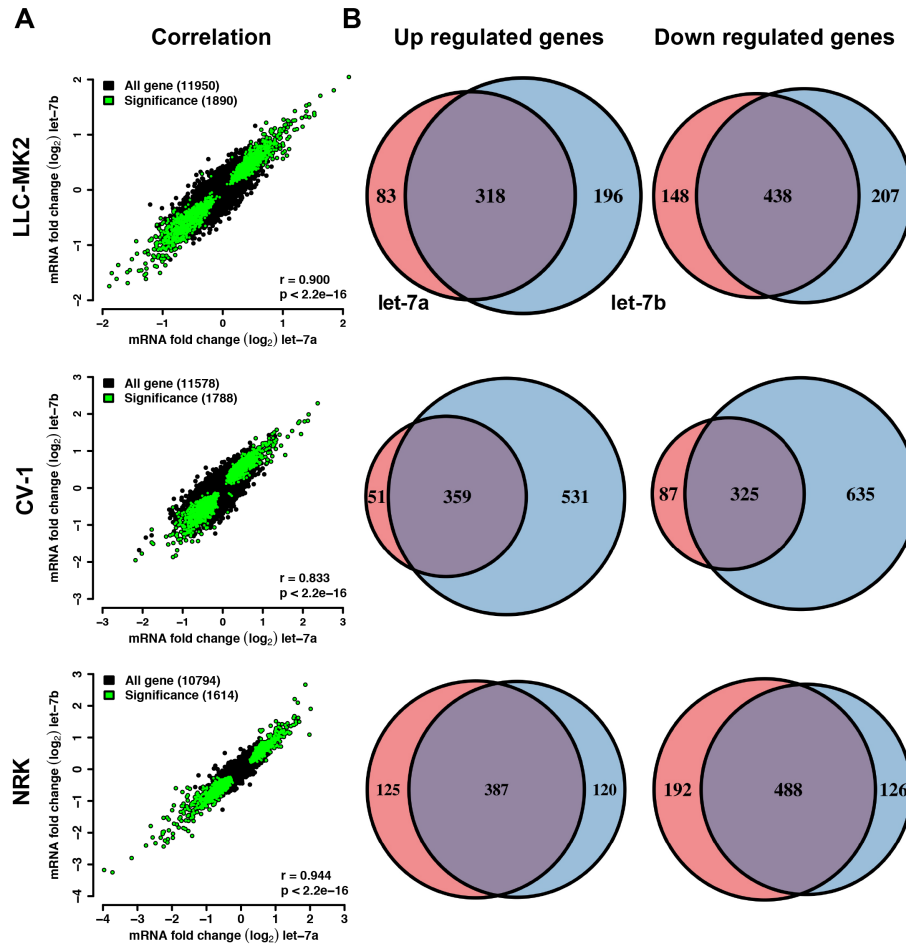

**Figure S12. Transcriptome sequencing of *let-7a* and *let-7b* transfected macaque (LLC-MK2), green monkey (CV-1) and rat (NRK) cell lines.** (A) The fold change ( $\log_2$ ) of mRNA abundance in *let-7a*-transfected MK2 (macaque), CV-1 (green monkey) and NRK (rat) cell lines relative to *let-7b*-transfected cells after 32 h. (B) Venn diagram demonstrating the number of genes with significantly up-regulated or down-regulated mRNA expression that were common or unique after the cells were transfected with *let-7a* or *let-7b* for 32 h.

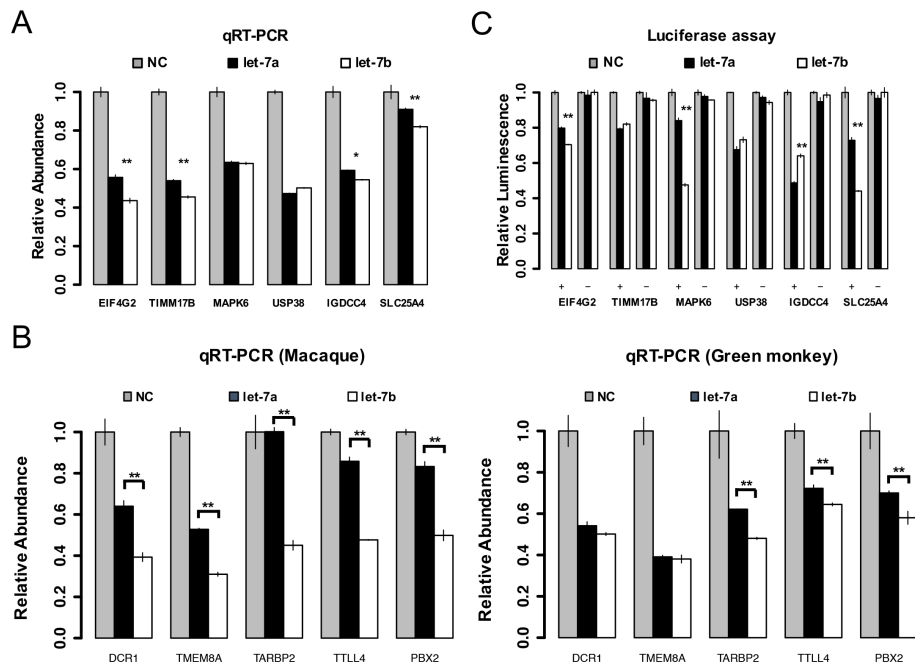

**Figure S13. Experimental verification of *let-7a* and *let-7b* target repression by qRT-PCR and luciferase reporter assay.**

(A) qRT-PCR results verified the down-regulation of target genes after transfection of human 293FT cells with *let-7a* (black) or *let-7b* (white). Statistically significant differences in the repression efficiency between *let-7a* and *let-7b* for each gene are indicated with asterisks (\*,  $P < 0.05$ , \*\*,  $P < 0.01$ , Kolmogorov-Smirnov test). Cells transfected with a negative control small RNA (NC) were used as controls (gray).

(B) qRT-PCR results verified the down-regulation of target genes in the *let-7a* (black) or *let-7b* (white) transfection experiments (32 h post-transfection) for macaque (left) and green monkey (right). Error bars represent the standard error among 3 replicates. Statistically significant differences between *let-7a* and *let-7b* are indicated by asterisks (\*\*,  $P < 0.01$ , Kolmogorov-Smirnov test).

(C) Luciferase reporter assay results verified the repression of target genes of *let-7a* (black) and *let-7b* (white) in human 293FT cells. The y-axis shows the relative luminescence of the luciferase reporter gene fused to 3' UTR fragments with canonical target sites (+) relative to genes with mutant sites (-). Statistically significant differences in repression efficiency for the target sites between *let-7a* (black) and *let-7b* (white) are marked with asterisks (\*\* $P < 0.01$ , Kolmogorov-Smirnov test).



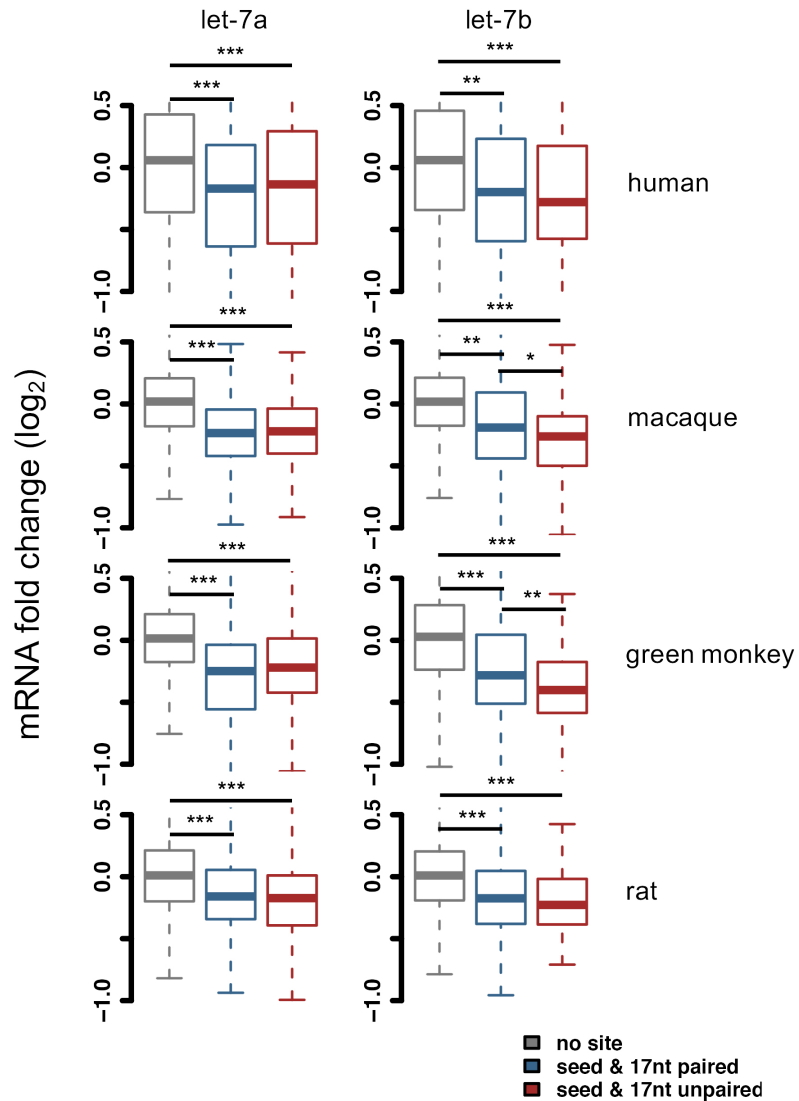

**Figure S14. Changes in the mRNA abundance (y-axis) of the conserved canonical target genes (seed pairing) that are paired (seed & 17 nt paired) or not paired (seed & 17 nt unpaired) to position 17 of *let-7a* (left) or *let-7b* (right) in the cellular transfection experiments. The genes without any site complementary to the seed sequence of *let-7a/b* were used as controls (\*,  $P < 0.05$ ; \*\*,  $P < 0.01$ , \*\*\*,  $P < 0.001$ ; Wilcoxon test).**

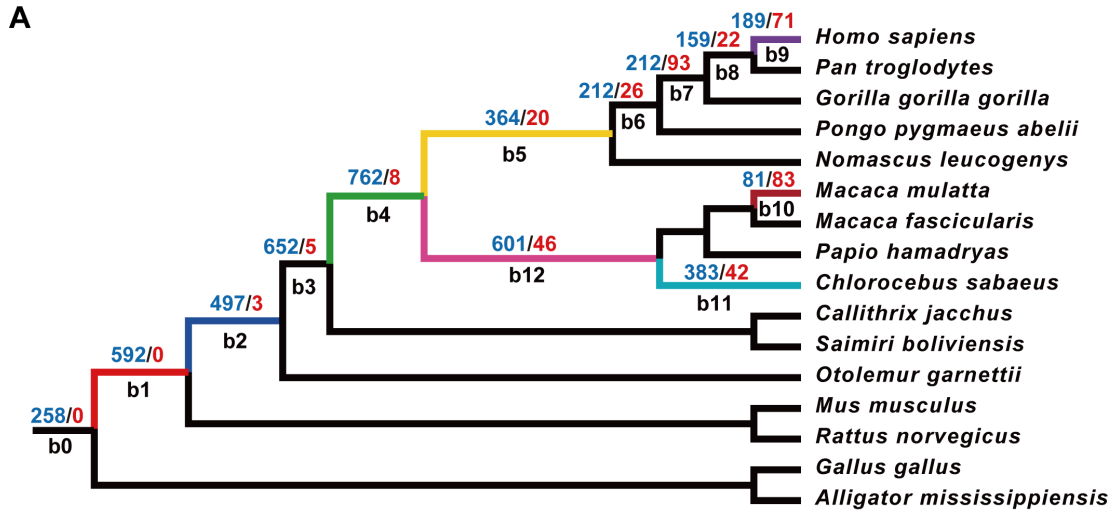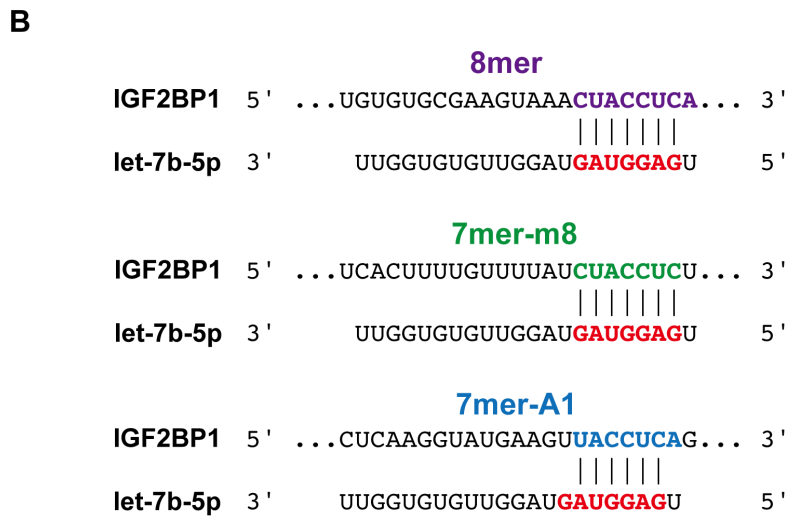

**Figure S15. Birth and death of *let-7* canonical target sites during mammalian evolution.**

(A) The gain and loss of *let-7a/b* canonical target sites in the branches leading to extant primates. The numbers of gain and loss events are in blue and red, respectively. All the three types of target sites that are complementary to the seed of *let-7* (8mer, 7mer-m8 and 7mer-A1) are presented.

(B) Examples show the definition of three types of canonical target site. IGF2BP1 is a target gene of *let-7* family, which harbors all the three types of target sites on its 3'UTR.

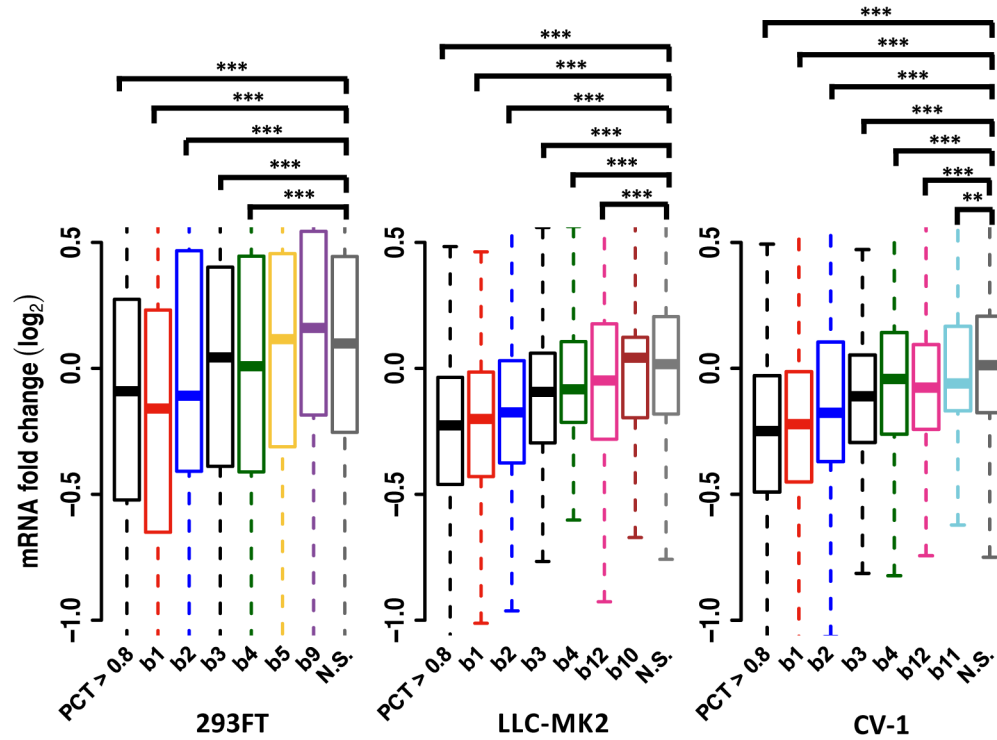

**Figure S16. Changes in the mRNA abundance of genes with ancient or newly emerged target sites in human, macaque and green monkey cells transfected with *let-7a*.**  $P_{cr}$  represents target genes of *let-7a* predicted by TargetScan ( $P_{cr} > 0.8$ ). The genes with target sites originating in a branch and maintained thereafter were used in the analysis. If a gene had multiple target sites of different ages, the gene was assigned to the most ancient class. The genes without any site complementary to the seed sequence of *let-7alb* (N.S., no sites) were used as controls (\*,  $P < 0.05$ ; \*\*,  $P < 0.01$ , \*\*\*,  $P < 0.001$ ; Kolmogorov-Smirnov test).

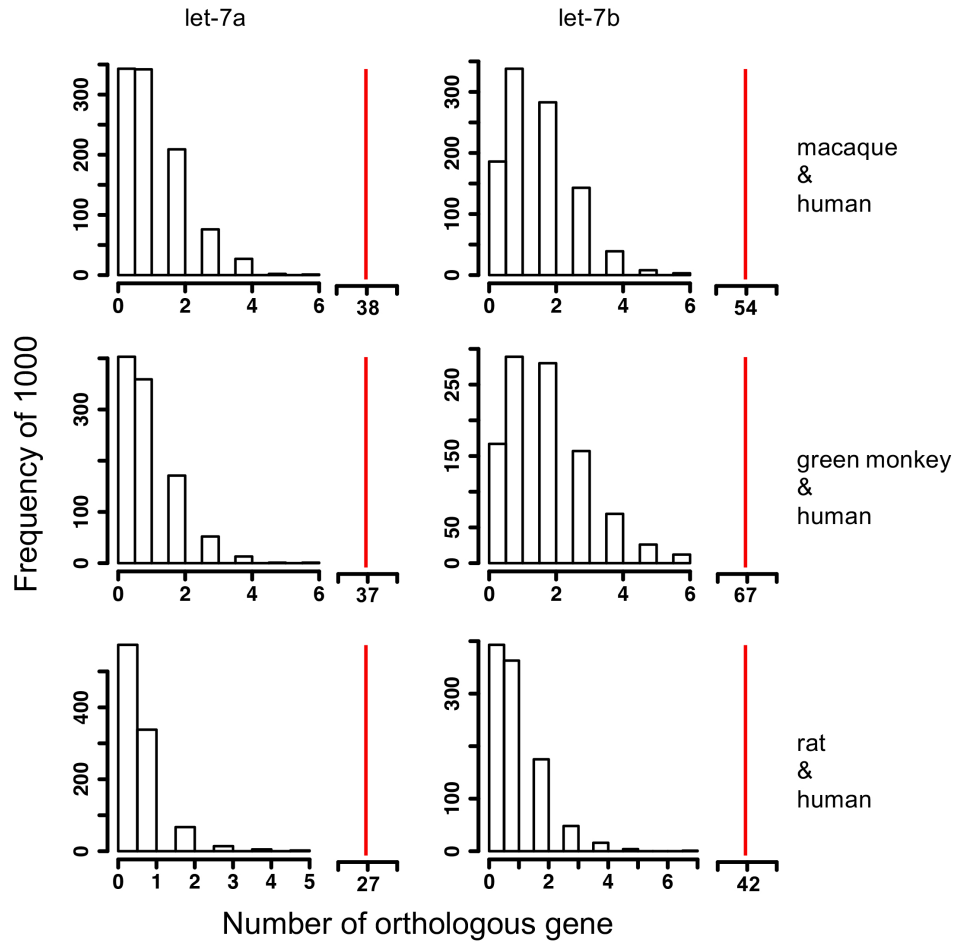

**Figure S17.** The observed numbers of the orthologous target genes of *let-7a/b* between humans and other mammalian species are significantly higher than the numbers obtained under the assumption of randomness. For each comparison, the distribution of the simulated numbers of target genes down-regulated in both humans and other species is shown in black, and the observed value is in red. The simulated numbers were obtained based on random sampling the same numbers of genes in the gene expressed in each species and counting the over-lapping genes. 1000 replicates were conducted in each simulation.

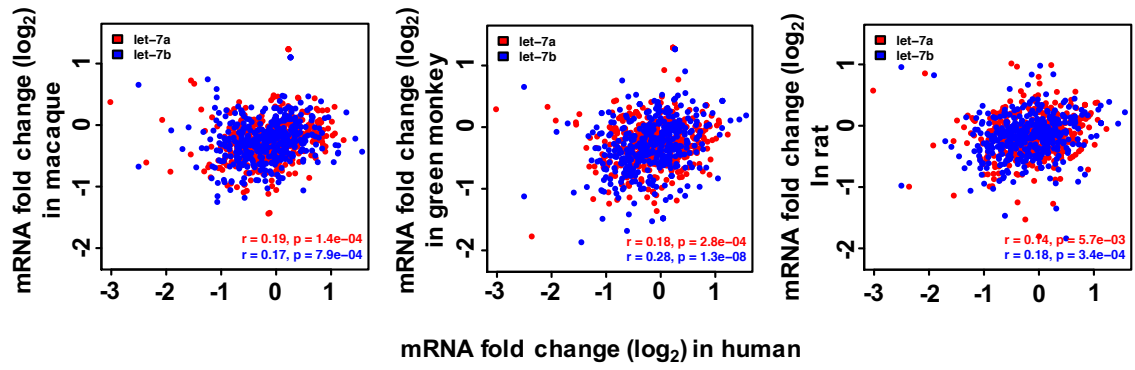

**Figure S18.** The mRNA expression changes for orthologous target genes of *let-7a/b* are weakly correlated between humans and other mammalian species in both the *let-7a* (red) and *let-7b* (blue) experiments. The three groups are human versus macaque, human versus green monkey, and human versus rat.

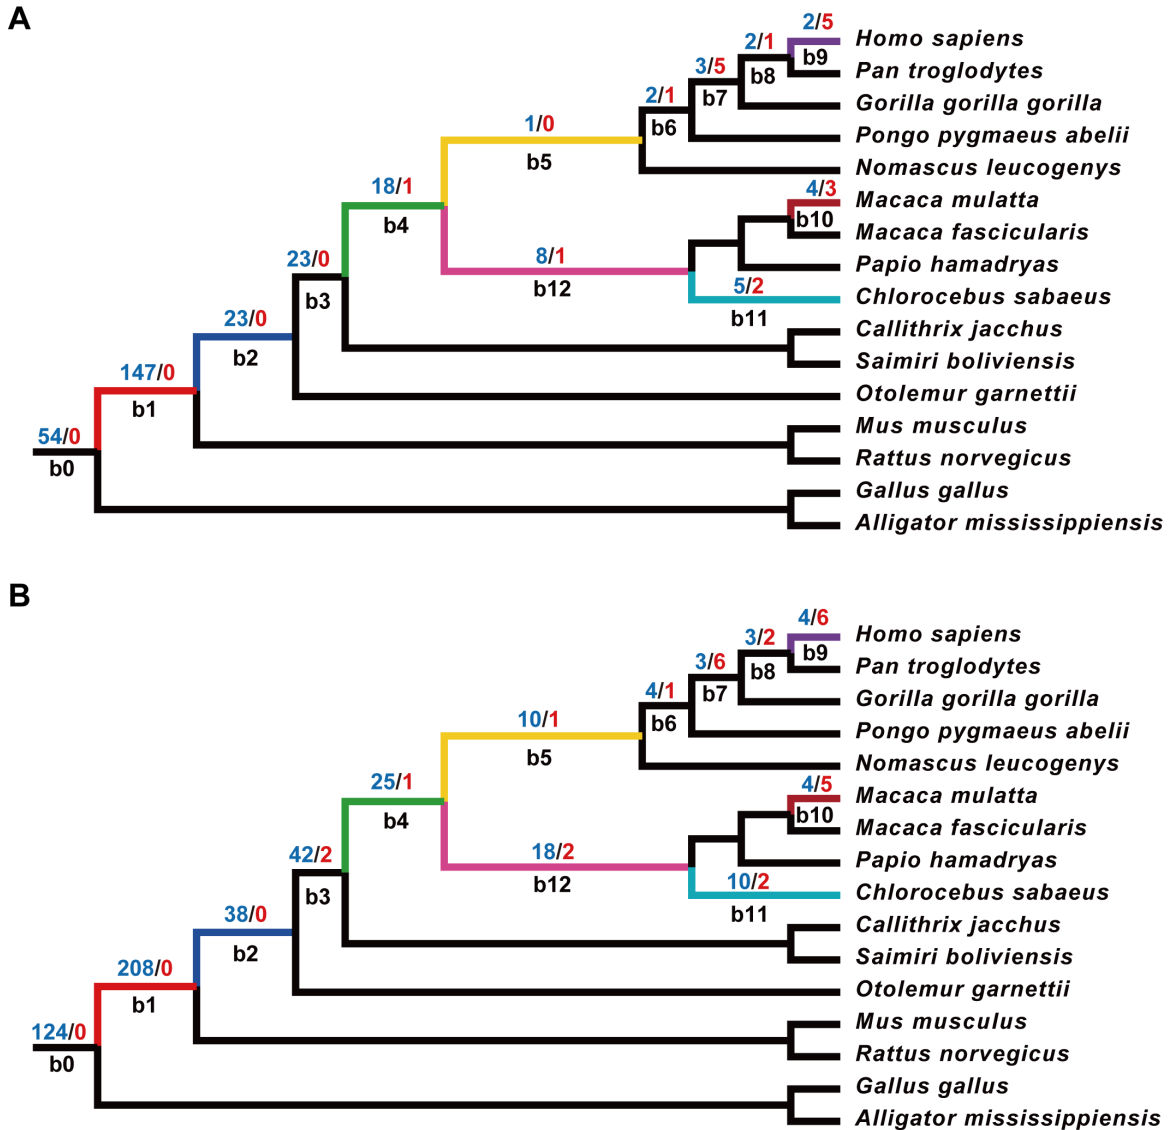

**Figure S19.** The gain and loss events of non-conserved target sites in the conserved target genes of *let-7*. Only the genes with at least one conserved target site with  $P_{CT} > 0.8$  were considered.

**(A)** Target sites based on seed perfect pairing (8mer and 7mer-m8 in TargetScan);

**(B)** All canonical target sites (8mer, 7mer-m8 and 7mer-A1 in TargetScan). The numbers of gain and loss events in each branch are in blue and red, respectively.

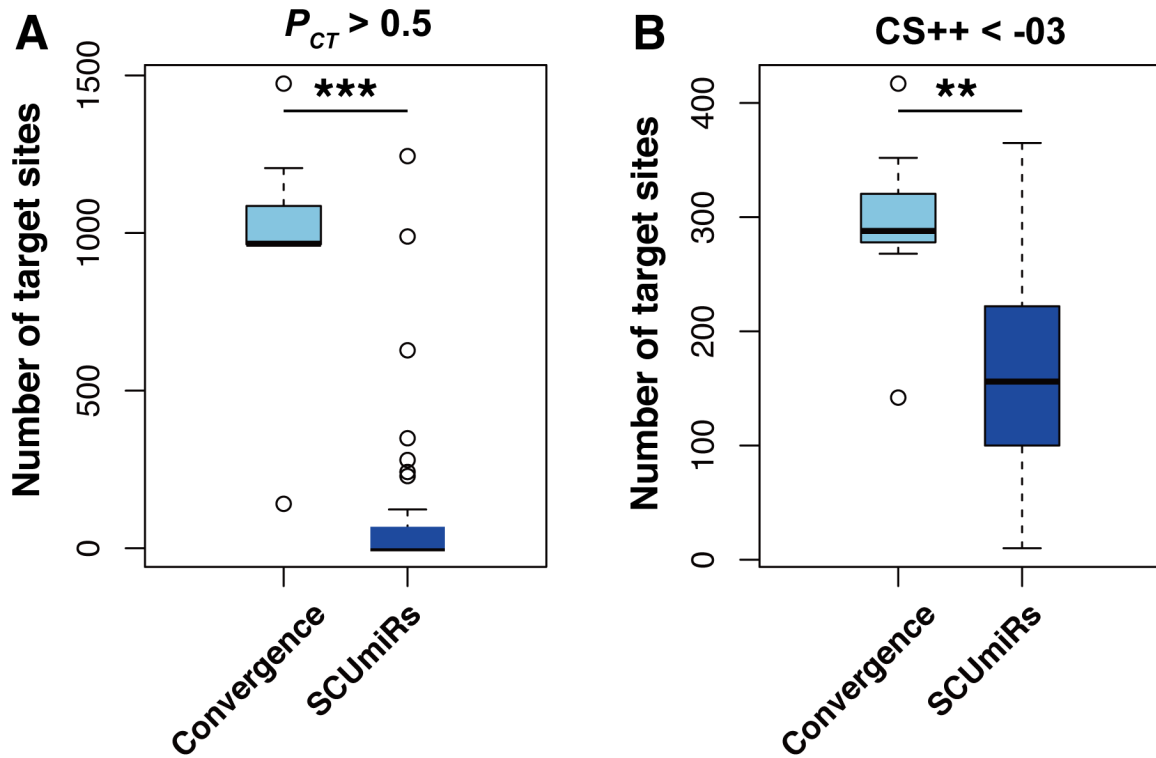

**Figure S20.** The numbers of target sites are higher for the broadly conserved Convergence miRNAs than the SCUmIRs (\*\*,  $P < 0.01$ ; \*\*\*,  $P < 0.001$ ; WMW test).

(A) Boxplot of the numbers of conserved target sites (TargetScan  $P_{ct} > 0.5$ ).

(B) Boxplot of the numbers of target sites with Context++ Score  $< -0.3$ .

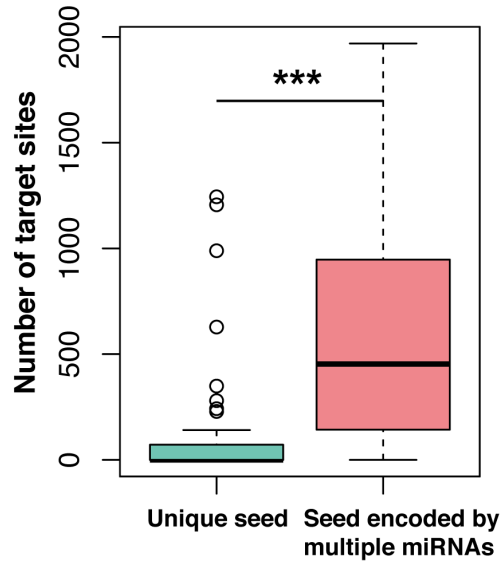

**Figure S21. Seeds shared by multiple broadly conserved miRNAs pair higher numbers of conserved target sites ( $P_{cr} > 0.5$ ) than those of the single-copy miRNAs.** Only the seeds of the broadly conserved miRNAs were considered (\*\*\*,  $P < 0.001$ , WMW test).



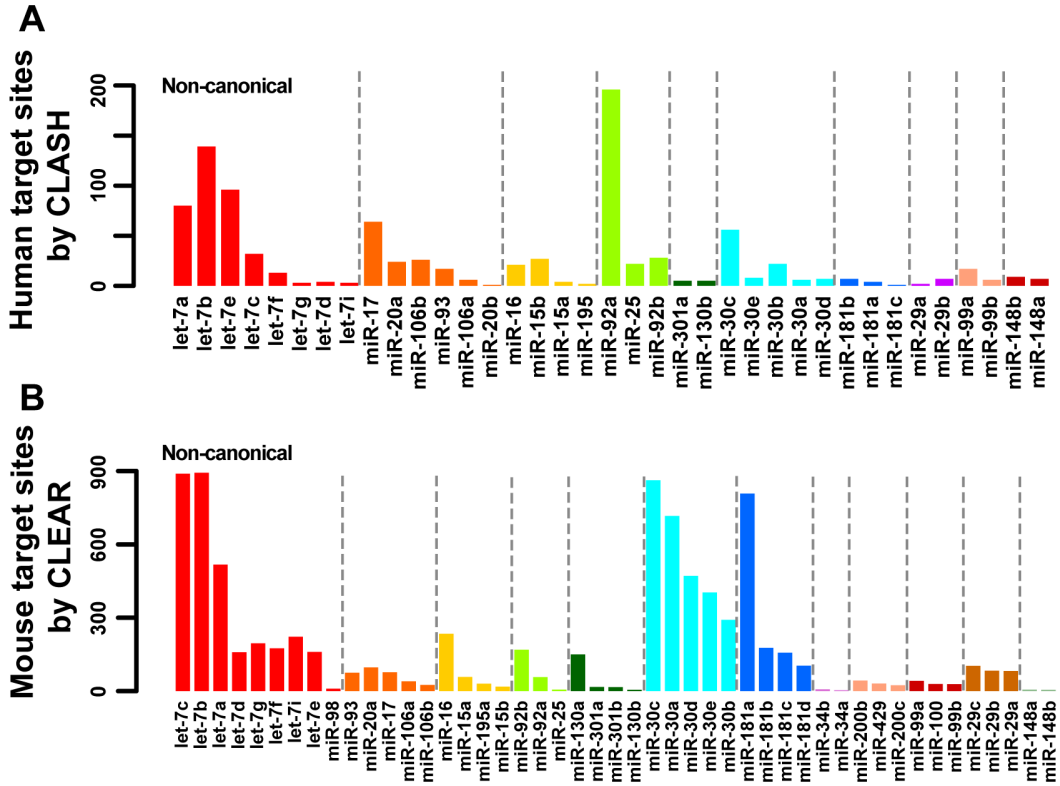

Figure S22. The numbers of non-canonical target sites bound by each miRNA member in ten representative miRNA families in the CLASH HEK-293T cell dataset (A) and the CLEAR mouse brain dataset (B).

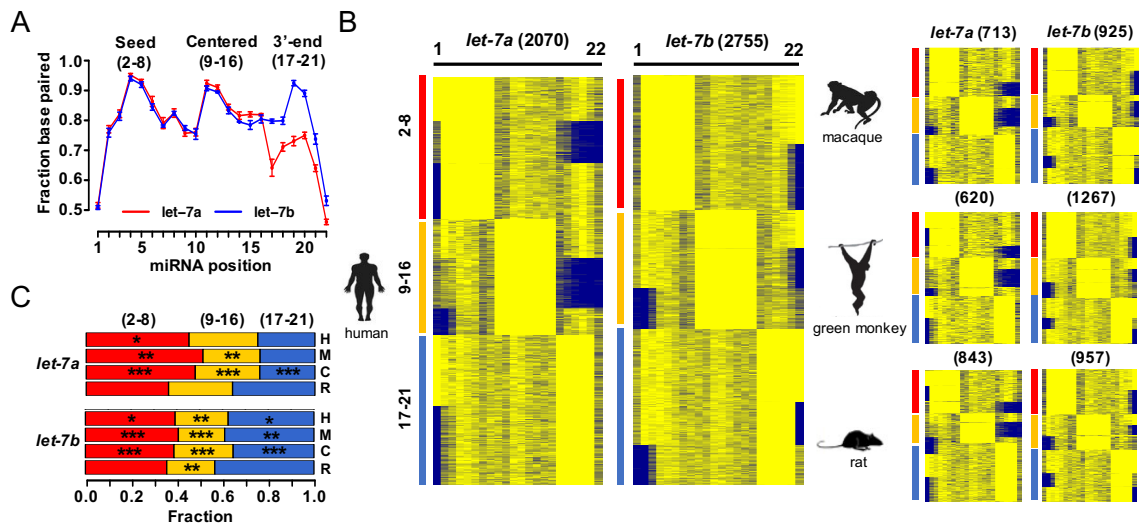

**Figure S23. The putative non-canonical target sites in 3' UTRs recognized by *let-7a* or *let-7b*.**

(A) The fraction of each nucleotide in *let-7a* and *let-7b* that is paired to the putative target sites out of all the possible targets in human 3' UTRs. RNAhybrid was used to predict the target sites with the default parameter settings. Perfect pairing between the *let-7a/b* seed sequence and target sites was not required in the analysis.

(B) The heatmaps of the putative target sites that are paired to the 5' end (position 2-8), center (9-16) and 3' end (17-21) of *let-7a* or *let-7b*. In each of the four species, the putative target sites that are associated with mRNA destabilization in each experiment are presented (detailed numbers are presented in parenthesis).

(C) The fraction of predicted target sites (5' end, center, or 3' end) of *let-7a* or *let-7b* in human (H), macaque (M), green monkey (G) and rat (R). For target sites of each category, Fisher's exact test was employed to test whether those target mRNAs were significantly enriched in the down-regulated gene sets in the corresponding transfection experiment (\*,  $P < 0.05$ ; \*\*,  $P < 0.01$ ; \*\*\*,  $P < 0.001$ ).
